**Filamentation of the bacterial bi-functional alcohol/aldehyde dehydrogenase AdhE is essential for substrate channeling and enzymatic regulation.**

Pauline Pony<sup>1,2</sup>, Chiara Rapisarda<sup>1,2,4</sup>, Laurent Terradot<sup>3</sup>, Esther Marza<sup>1,2</sup> and Rémi Fronzes<sup>1,2</sup>.

<sup>1</sup> Structure and Function of Bacterial Nanomachines – Institut Européen de Chimie et Biologie, University of Bordeaux, 2 rue Robert Escarpit, 33600, Pessac

<sup>2</sup> Microbiologie fondamentale et pathogénicité, UMR 5234, CNRS, University of Bordeaux, 2 rue Robert Escarpit, 33600, Pessac

<sup>3</sup> UMR 5086 Molecular Microbiology and Structural Biochemistry, Institut de Biologie et Chimie des Protéines, CNRS-Université de Lyon, France

<sup>4</sup> Current address: UCB Celltech, Slough, UK

Corresponding authors: [esther.marza@u-bordeaux.fr](mailto:esther.marza@u-bordeaux.fr) and [remi.fronzes@u-bordeaux.fr](mailto:remi.fronzes@u-bordeaux.fr)

## Abstract

Acetaldehyde – alcohol dehydrogenase (AdhE) enzymes are a key metabolic enzyme in bacterial physiology and pathogenicity. They convert acetyl-CoA to ethanol *via* an acetaldehyde intermediate during ethanol fermentation in anaerobic environment. This two-step reaction is associated to NAD<sup>+</sup> regeneration, essential for glycolysis. The bifunctional AdhE enzyme is conserved in all bacterial kingdoms but also in more phylogenetically distant microorganisms such as green microalgae. In synthetic biology and biotechnology, because of its central role in bacterial alcoholic fermentation, AdhE raised a lot of attention as a key enzyme to produce ethanol from bacterial cultures.

AdhE is commonly found as an oligomeric form called spirosomes. While these helical macromolecular assemblies are conserved, their function remains elusive. We used cryo-electron microscopy to obtain structures of *Escherichia coli* spirosomes in different conformational states. We confirm that spirosomes contain active AdhE monomers and show that AdhE filamentation is essential for its activity *in vitro* and function *in vivo*. The detailed analysis of these structures provides insight showing that AdhE filamentation is essential for substrate channeling within the filament and for the regulation of enzyme activity. These new data will help to design molecules or mutations that control AdhE activity to fight bacterial pathogens or to optimize ethanol production in biotechnology.

Facultative anaerobe bacteria, such as *Escherichia coli*, are metabolically versatile and are able to grow under a wide range of oxygen concentrations, from anaerobic conditions in the gut to aerobic environments. This metabolic adaptability is vital for the fitness and survival of commensal and pathogenic bacteria. In absence or low concentrations of oxygen, bacteria use fermentation to survive. The bifunctional alcohol – acetaldehyde dehydrogenase enzyme (AdhE) is a key metabolic enzyme of the alcoholic fermentation pathway. This 96kDa enzyme is highly expressed in absence of oxygen and essential for ethanol production in *E. coli*<sup>1</sup>. It is composed of a N-terminal acetaldehyde dehydrogenase (AldH) domain and a C-terminal iron-dependent alcohol dehydrogenase (ADH) domain. AdhE converts acetyl-coenzyme A to acetaldehyde and then to ethanol, in a two-step reaction that is coupled with the oxidation of two NADH molecules into NAD<sup>+</sup>. The biochemistry of AdhE enzymatic activities is well characterized<sup>2,3</sup>. In particular, a lot of investigations looked into this key fermentative enzyme in order to engineer novel ethanol-producing bacteria<sup>4,5</sup> or identify bacterial strains capable of growing under ethanol<sup>6</sup>.

Interestingly, the biological role of AdhE seems to go beyond alcoholic fermentation. This protein could also be directly or indirectly involved in bacterial pathogenicity. In *Listeria monocytogenes*, the *Listeria* adhesion protein LAP (homologous to AdhE) promotes bacterial adhesion by interacting with a receptor of intestine cells<sup>7,8</sup>. It has also been reported in *Streptococcus pneumoniae* that AdhE also promotes bacterial adherence<sup>9</sup>. In *Escherichia coli*, this enzyme would play a role during colonization by regulating the expression of key virulence genes<sup>10</sup>. Finally, AdhE could also act as a peroxide scavenger under aerobic conditions<sup>11</sup>.

While alcohol and acetaldehyde dehydrogenases are found as monofunctional enzymes in all kingdom of life, the bi-functional enzyme AdhE is found mostly in bacteria and in some unicellular eukaryotes such as microalgae. Intriguingly, AdhE is capable of oligomerization and

forms a filament (identified as spiroosome in early studies). These helical macromolecular assemblies were observed for the first time in the 70's in bacteria<sup>12</sup>. These filaments of AdhE are widely conserved in bacteria<sup>13</sup> and also in phylogenetically distant organisms such as *Chlamydomonas reinhardtii*<sup>2</sup> and *Entamoeba histolytica*<sup>14</sup>. While their wide conservation probably highlights an essential function, the exact role of AdhE filaments remains unknown. Recently, the cryoEM structure of the spiroosome from *E. coli* was reported<sup>15</sup>. This study confirmed that AdhE is composed of canonical aldehyde dehydrogenase (AIDH) and alcohol dehydrogenase (ADH) domains, interconnected by a short linker. As proposed in earlier studies<sup>15,16</sup>, the AdhE oligomerisation interfaces are mediated by canonical ADH-ADH and AIDH-AIDH dimerisation interfaces. In the spiroosomes, AdhE monomers are interlocked in a head-to-head manner through the AIDH-AIDH dimerisation interface. These dimers are further assembled into a helical filament through ADH domain dimerisation. Finally, it was shown that spiroosomes display AIDH and ADH activities and that the integrity of the ADH-ADH interface, which is essential for the spiroosome assembly, is also essential for AdhE activity *in vitro*<sup>15</sup>.

Here, we used cryo-electron microscopy to obtain structures of *Escherichia coli* spiroosomes in different conformational states using helical reconstruction as well as single particle analysis. The detailed analysis of these structures provides insight showing that AdhE filamentation is essential for substrate channeling between the AIDH and ADH domains and for the regulation of enzyme activity. Finally, we confirm that spiroosomes contain active AdhE monomers and show that AdhE filamentation is essential for AIDH activity *in vitro* and AdhE function *in vivo*.

## Results

### **CryoEM reveals the architecture of *Escherichia coli* spiroosomes in their compact and extended states.**

In early studies, Kessler *et al.*, reported that the *E. coli* spiroosomes were found in closed (compact) or open (extended) conformations and would change their conformation upon the addition of ligands. Strikingly, we and others reported the observation of native spiroosomes isolated from various bacterial and eukaryotic species, all found exclusively in the open/extended conformation. Therefore, the extended form of the AdhE filaments could be the functionally active form of the filament and the conformational change observed, which seems to depend on the binding of the co-factors, could be an important feature for the regulation of its activity.

The *adhE<sup>E. coli</sup>* gene was cloned in a high copy number vector and expressed in *BL21 E. coli* cells. Recombinant N-terminally His<sub>6</sub>-tagged AdhE was purified by Ni-NTA affinity chromatography followed by gel filtration. The fraction containing filaments was collected in the void volume of the gel filtration column (Supplementary Fig. 1b) (see Methods section for details). Purified spiroosomes were incubated with various combinations of ligands to determine the conditions, which trigger this conformational change (Fig. 1a). Samples were deposited on cryoEM grids and vitrified in liquid ethane. Micrographs of frozen-hydrated spiroosomes were collected using a Talos Arctica cryo-electron microscope equipped with K2 summit direct electron detector. CTF-corrected and re-aligned movies were analyzed using RELION 3 software<sup>17</sup>. Non-overlapping helical segments were sorted with several rounds of 2D classification. In the classes obtained, we could clearly distinguish the compact and extended conformations of the spiroosomes and we confirmed that in absence of ligand (apo), the spiroosomes are compact

(Fig. 1a). Incubation with  $\text{NAD}^+$  and  $\text{Fe}^{2+}$  is sufficient to extend the filaments. The addition of Co-enzyme A does not impair this conformational change triggered by  $\text{NAD}^+$  and  $\text{Fe}^{2+}$  (Fig. 1a). Interestingly, we show that in the same conditions NADH and  $\text{Fe}^{2+}$  is not able to trigger a conformational change from the compact to the extended form (Fig. 1a). However, it was reported that NADH could trigger the spiroosomes extension<sup>15,18</sup>. While similar conditions were used in term of protein and ligand concentrations, we could not reproduce this result.

The recently reported cryoEM structure of the *E. coli* spiroosome was obtained in absence of ligand (apo form). Therefore, the spiroosomes were observed in the closed/compact conformation. In order to obtain the structure of the *E. coli* spiroosomes in their extended and compact form both in presence of ligands, we collected larger datasets of the spiroosomes incubated with  $\text{NAD}^+$ ,  $\text{Fe}^{2+}$  and CoA or with NADH and  $\text{Fe}^{2+}$ . Since in both cases, the filaments were rather short and flexible, we chose to use single particle analysis to solve their structure. However, we also used helical reconstruction in parallel to uncover the helical symmetry parameters of these filaments and obtain a cryoEM map of the complete assemblies. For single particle analysis, after 2D classification, an initial model was generated and refined in RELION. The structure corresponding to the AdH and ADH domains were identified in the map. The part of the map corresponding to one AdH dimer in interaction with two adjacent ADH domains (colored in Fig. 1b and 1c) were further refined by focused refinement. The final map was obtained after Bayesian polishing, subtraction and focused refinement. A resolution of 3.2 Å and 3.8 Å was obtained for the extended and compact spiroosome respectively (Supplementary Fig. 2). For helical reconstruction, after 2D classification, an initial map was reconstructed without any symmetry imposed using a feature-less cylinder as a 3D reference. The helical symmetry of the AdH filaments was determined in real space and was imposed during further refinements. The final 3D reconstruction was obtained after Bayesian polishing.

The overall resolution of the final masked map was estimated to be 4.4 Å and 5 Å for the extended and compact spiroosomes respectively (Supplementary Fig. 2). The refined helical symmetry was 56.5 Å rise and 164.4° twist of the extended spiroosome and 34.7 Å and 154.5° twist for the compact spiroosome. The maps used to reconstitute the complete spiroosome assembly were obtained after imposing these symmetry parameters to the central section of the map (30%) of the maps obtained (Fig. 1d-e and Supplementary Fig. 3).

### **Structure of the AdhE filament in its extended state.**

Since this work was started before the publication of the work by Kim *et al.*, homology models of AdhE AIDH and ADH domains obtained using Swissmodel<sup>19</sup> were docked in the map of the extended spiroosome obtained by single particle analysis. A complete structural model was rebuilt inside the densities using *Coot* and then refined and validated using *PHENIX*<sup>30-31</sup> (see Methods section for details). As described previously<sup>15</sup>, the AdhE monomer is composed of a N-terminal acetaldehyde dehydrogenase domain (AIDH) connected by a linker region to the C-terminal alcohol dehydrogenase domain (ADH) (Fig. 2a). Each domain resembles the canonical AIDH and ADH domains found in the corresponding monofunctional enzymes. From N- to C-terminus of each domain, they are composed of a NAD-binding domain and catalytic domain. Two AdhE protomers are interlocked with apparent C2 symmetry to form the AdhE dimer (Fig. 2b). These protomers will be named ( $\alpha$  or  $\beta$ ) and their respective domains  $\alpha$ -AIDH,  $\alpha$ -ADH,  $\beta$ -AIDH or  $\beta$ -ADH. Clear density for NAD<sup>+</sup> and Fe<sup>2+</sup> could be observed in the density map in the AIDH and ADH domains in both subunits of the AdhE dimer (Fig. 2a). The AdhE helical assembly can be described as one AdhE dimer repeated along a right-handed helix with a helical twist of 164.5Å and a rise of 56.4Å (Fig. 1c). To obtain a model of the AdhE filament, the AdhE dimer was docked in the map obtained by HR and duplicated using the helical

parameters. Based on these helical parameters and polarity, the AdhE dimers will be numbered  $n, n+1, n+2, \dots$

### **Structure of the AdhE filament in its compact state.**

The structure of the AdhE spiroosome in its compact state was obtained using the same strategy. The overall structure of the AdhE monomer is unchanged (Fig. 2d). Clear density for  $\text{Fe}^{2+}$  and NADH could be found in the ADH domain (Fig. 2d). No density is visible for NADH within the AIDH domain. Within the AdhE dimer, both subunits are related by apparent C2 symmetry (Fig. 2e). Using the helical parameters and map obtained by HR, we could build a structural model for the spiroosome in its compact state (Fig. 2f). We will use the same nomenclature for AdhE domains and protomers than described above. We notice that this structure is highly similar to the structure recently published in its apo-form<sup>15</sup> (Supplementary Fig. 4).

### **Inter-domain interactions within the extended AdhE filament.**

In the extended AdhE filament, three different inter-domain interfaces are formed. Within each AdhE dimer, two interfaces are found. The dimer is maintained through an acetaldehyde-acetaldehyde dehydrogenase interface (named  $(\alpha\text{-AIDH})_n/(\beta\text{-AIDH})_n$  interface) and two symmetric acetaldehyde-alcohol dehydrogenase interfaces (named  $(\alpha\text{-AIDH})_n/(\beta\text{-ADH})_n$  and  $(\alpha\text{-ADH})_n/(\beta\text{-AIDH})_n$  interfaces). Along the helical assembly, on both sides of the dimer  $n$ , are found two equivalent interfaces between alcohol dehydrogenase domains (named  $(\alpha\text{-ADH})_{n-1}/(\beta\text{-ADH})_n$  and  $(\alpha\text{-ADH})_n/(\beta\text{-ADH})_{n+1}$ ). The  $(\alpha\text{-AIDH})_n/(\beta\text{-AIDH})_n$  interface is characterized by hydrogen bonds (Supplementary Fig. 5a and Fig. 6b). The  $(\alpha\text{-AIDH})_n/(\beta\text{-$



ADH)<sub>n</sub> and ( $\alpha$ -ADH)<sub>n</sub>/ ( $\beta$ -AIDH)<sub>n</sub> interfaces are maintained by 5 salt bridges and a vast network hydrogen bonds scattered along the interfaces (Supplementary Fig. 5b and Fig. 6a). Moreover, the dimer is stabilized by the interaction between the oligomerization domain (residues 87-101) and the linker (residues 440-451) of one AIDH with a  $\beta$ -sheet of the other AIDH catalytic domain. The ( $\alpha$ -ADH)<sub>n</sub>/( $\beta$ -ADH)<sub>n+1</sub> interface is stabilized by 4 salt bridges and hydrogen bonds (Supplementary Fig. 5c and Fig. 6c).

### **Comparison with monofunctional enzymes reveals loops unique to AdhE homologs.**

The structure of AdhE was compared to the structure of monofunctional ADH or AIDH enzymes. We selected homologous monofunctional enzymes with active sites of similar topology than AdhE using the COACH server<sup>20,21</sup>. For AdhE AIDH domain, the crystal structure of *Rhodopseudomonas palustris* propionaldehyde dehydrogenase (PDB 5JFL) was identified. For AdhE ADH domain, the crystal structure of the lactaldehyde:1,2-propanediol oxidoreductase of *Escherichia coli* (PDB 2BL4) was identified. These monofunctional enzymes were compared to the corresponding AIDH and ADH domains in AdhE. As showed in Fig. 3a-b, the overall canonical fold found in AIDH and ADH enzymes is conserved in AdhE. Interestingly, the monofunctional enzymes are all active as a dimers or tetramers. By superimposing these structures with AdhE, we could observe that the interfaces present in dimers of monofunctional enzymes correspond to the ADH-ADH and AIDH-AIDH interfaces of the extended spiroosomes (Fig. 3a-b). Of note, in the AdhE filament in its compact state, the conformation of the AIDH domain as well as the AIDH-AIDH interface are not superimposable with their counterpart in the monofunctional enzymes.

Sequence alignments between *E. coli* AdhE and monofunctional ADH and AIDH enzymes reveal the presence of three loops that are specific to AdhE (Fig. 3c and Supplementary Fig. 7-8). Importantly, these loops are located close to the AIDH active site (loop1, residues 413-433) or at the AIDH-ADH interface in the AdhE dimer (loops 2 and 3, residues 561-589 and 758-772). Even if their sequence can vary, these loops are always present in the AdhE homologs (Fig. 2c and Supplementary Fig. 9).

### **The interface between the AIDH and ADH domains defines a channel between their active sites.**

In the monofunctional AIDH and ADH enzymes, access to the active site is possible by a continuous channel embedded between the catalytic and NAD-binding domains (Fig. 4a). On one side, one channel allows the binding of the NAD<sup>+</sup>/NADH (as well as of Acetyl-CoA for the AIDH) in the catalytic pockets. On the other side of the domains, a channel allows the entrance/exit of the substrates/products of the enzymatic reactions (ethanol and acetaldehyde). As showed in the Fig. 4a, these channels are conserved in the AIDH and ADH domains of AdhE. Remarkably, the substrate/product channels of the AIDH and ADH domains both lead to the two cavities located at the AIDH-ADH interfaces within the AdhE dimer. The loops 2 and 3 seal this cavity by mediating the interactions a between the AIDH and ADH domains (Fig. 4b). This allows a direct channeling between the AIDH and ADH domains active sites (Fig. 4c).

## **Extended spiroosomes contain catalytically active AdhE monomers.**

The comparison of AdhE structures in absence of co-factors<sup>15</sup>, in presence of cofactor bound only to the ADH domain or to both ADH and AIDH domains provides valuable insight about the regulation of AdhE enzymatic activities. While very little differences are observed between the structures of the Apo-ADH and NADH-bound ADH domains (Supplementary Fig. 4), the binding of NAD<sup>+</sup> in the AIDH domain induces a significant conformational change in this domain. Co-factor binding induces a closure of the AIDH catalytic site onto the NAD/NADH-binding domain (Fig. 5a). This induced-fit conformational change orients the key catalytic residues (Cys 246, His 367 and Glu 335) in the optimal orientation for catalysis (Fig. 5b). At the level of the whole domain, it modifies the orientation of the catalytic domain relative to the NAD/NADH-binding domain (Fig. 5c). This conformational change induced by the cofactor binding seems to be specific to AdhE. In homologous monofunctional AIDH enzymes, the cofactor binding site and catalytic residues adopt the same topology in absence and in presence of cofactor.

## **AdhE filamentation is essential for AIDH activity *in vitro*.**

The activities of AIDH and ADH domains within the purified spiroosome fractions was recently reported *in vitro* by using absorbance properties of NADH at 340 nm. We performed similar activity assays either in physiological conditions (at pH 7 in presence of acetyl-CoA and NADH) and in conditions forcing the reverse reaction (pH 8.8 in presence of ethanol, NAD<sup>+</sup> and CoA). Our results confirm that both AIDH and ADH domains are functional *in vitro* within the spiroosome fraction (Fig. 6c).

However, the spiroosome fraction contains spiroosomes but is also contaminated with smaller AdhE assemblies (tetramers, dimers, etc). In order to confirm that AdhE filaments are active, it is necessary to disrupt AdhE filamentation and monitor AdhE activity. The AIDH-AIDH and ADH-ADH interfaces is conserved across homologous monofunctional AIDH and ADH enzymes. The vast majority of these monofunctional proteins are active as dimer and the conservation of these interfaces along the filament could to be necessary for the activity of the domains. Therefore, we decided to shorten the linker between the AIDH and ADH domain to perturb the dimerization of AdhE. Guided by the structure, we generated a  $\Delta 446-449$  AdhE mutant. We showed that this deletion prevents the filamentation of AdhE (Fig. 6b and Supplementary Fig. 10a). Negative stain EM shows that the  $\Delta 446-449$ AdhE mutant does not assemble into long filament as WT AdhE (Fig. 6b). SEC-MALLS experiments determined that this mutant has a molecular mass of 200kDa suggesting that a dimer still formed (Supplementary Fig. 10b). The activities of the AIDH and ADH domains of  $\Delta 446-449$  AdhE were also monitored. In physiological condition (pH 7) the  $\Delta 446-449$  AdhE activity was drastically reduced compared to the WT AdhE activity (Fig. 6c). Indeed, the specific activities calculated for the Wild-Type AdhE and  $\Delta 446-449$  AdhE were 0.112 and 0.035 mmol.min<sup>-1</sup>.mg<sup>-1</sup> respectively. In reverse condition, the  $\Delta 446-449$  AdhE activity (0.351 mmol.min<sup>-1</sup>.mg<sup>-1</sup>) was not affected compared to Wild-Type AdhE (0.336 mmol.min<sup>-1</sup>.mg<sup>-1</sup>). These results show that the activity of the AIDH domain was strongly affected while the ADH domain was still functional when AdhE filamentation is disrupted.

### **Filamentation is essential for AdhE activity *in vivo*.**

The importance of AdhE filamentation on AdhE activity was established *in vitro* (this work and <sup>15</sup>). However, it was still unclear if it was essential for AdhE activity *in vivo* during fermentation.

To test the activity of the full-length AdhE and the  $\Delta 446-449$  AdhE *in vivo*, complementation assays were carried out using a  $\Delta$ AdhE K12 strain<sup>22</sup> as described in Methods section.  $\Delta$ AdhE *E. coli* was transformed with plasmid PKG116 expressing full-length AdhE leading to restoration of bacterial growth in minimal medium in low concentration of oxygen. In contrast, the strain transformed with PKG116 expressing  $\Delta 446-449$  AdhE was not able to grow under the same conditions (Fig. 6d). These results show that the filamentation of AdhE and functional AIDH enzymatic activity is not only necessary for ethanol production during fermentation but also for regenerating NAD<sup>+</sup> pool required for bacterial growth. The presence of the full-length AdhE and the  $\Delta 446-449$  AdhE was confirmed by Western-blot using anti-AdhE antibody (Supplementary Fig. 10c).

## Discussion

Recently, a study reported the structure of the compact conformation of the AdhE spiroosomes<sup>15</sup> in absence of any cofactor bound. Here, we present the structure of the spiroosomes in presence of cofactors in their compact and extended conformation. We reveal the specific organization between AdhE monomers with three different interfaces along the filament: AIDH-AIDH interface, ADH-ADH interface and AIDH-ADH interface. While the AIDH-AIDH and ADH-ADH interfaces are conserved in the corresponding monofunctional enzymes, the AIDH-ADH interface is specific to AdhE homologs. At this interface, specific loops inserted in the ADH domain (loops 2 and 3) define a channel connecting directly the active sites of one ADH domain to its adjacent AIDH domain. During alcoholic fermentation, this substrate channeling prevents the acetaldehyde produced by the AIDH domain, a highly toxic intermediate, to be released in the cytoplasm. In addition, this channeling is probably

important for an efficient coupling of the AIDH and ADH enzymatic activities. Interestingly, bacteria evolved other strategies to confine multi-enzymatic reactions and prevent the release of toxic intermediates<sup>23</sup>. In *salmonella*, bacterial microcompartment resembling viral capsids encapsulate aldehyde and alcohol dehydrogenase activities to optimize catalysis and prevent the release of toxic intermediates<sup>24</sup>.

Early studies showed that the addition of cofactors triggers a conformational change in *E. coli* spiroosomes. While these results were recently confirmed, the molecular basis of this phenomenon was not understood. In our study, we show that cofactor binding to both the ADH and AIDH domains of AdhE is required to trigger AdhE filament extension. Therefore, only extended filaments are bound to cofactors and are able to catalyze the two-step reaction of conversion of acetyl-CoA to ethanol. Our structural data show that, in the compact AdhE filament, the AIDH domain is in a conformation that is not favorable for cofactor binding and for catalysis. We show that cofactor binding to this domain triggers an induced-fit conformational change which activates this active site and induces the closure motion of the AIDHn catalytic domain onto the co-factor binding domain in the AIDH domain. In turn, this motion is transmitted to the ADHn-ADHn+1 dimer, which behaves as a rigid body moving towards the center and extremity of the filament. Since they allow a tight contact between the AIDH and ADH domains, the ADH loops 2 and 3 are essential to the transmission of this motion. The AIDHn+1 domain contacting the ADHn+1 is in turn affected by the motion and switches its active site into an active conformation without the need of cofactor binding. We propose that, in the extended filament, a fraction of the AIDH domains bound to cofactors maintains the other AIDH active sites in an active conformation, optimal for substrate and cofactor binding and for catalysis. The observation that AIDH activity is impaired when AdhE filamentation is prevented supports the hypothesis of a cooperative behavior between AIDH

active sites within the AdhE filament. In the mutants generated by us and others, the AIDH active site or dimerization interface is not directly affected by the mutation(s). However, each AIDH active site of the AdhE dimer needs to convert from inactive to active conformation at each catalytic cycle. Interestingly, we do not observe any filament extension in presence of NADH. While this cofactor is bound to the ADH domain, its binding to the AIDH domain could be dependent on the covalent binding of the acetyl moiety to the catalytic cysteine residue or on the binding of NAD<sup>+</sup> to other AIDH domains within the filament. Furthermore, it has already been reported for the betaine aldehyde dehydrogenase<sup>25</sup> that the kinetic of NADH binding could be affected by the prior binding of NAD<sup>+</sup> or the aldehyde.

## Conclusion

More than twenty enzymes self-assemble as polymers (as reviewed in <sup>26</sup>). For the vast majority of them, polymer formation is essential for enzyme activity. For AdhE, we confirm the previous observation that AdhE filamentation is necessary for its activity *in vitro*. In addition, we show that this filamentation is essential *in vivo* during fermentation and anaerobic growth in minimal medium. However, until now, the exact role of filamentation in AdhE function was unclear. Indeed, the recent structure of the spiroosome in their compact conformational state<sup>15</sup> did not bring any clear answer to this question.

We propose that the conformational switch from compact to extended conformation could be used by the bacteria to regulate AdhE activity. The compact conformation would be a storage form of inactive AdhE protomers. In low oxygen conditions, the pool of NADH to be oxidized to NAD<sup>+</sup> to be used in the glycolytic process increases in the bacterial cell. NADH binding to some AdhE subunits within the spiroosomes would have a cooperative effect to convert the whole spiroosome from compact to extended conformation and quickly activate all

the AdhE subunit within the whole filament. The acetyl-CoA binding would be required for binding of the NADH to the AIDH domain. As long as the pool of NADH stays high within the cell, the AdhE filaments would stay extended and highly active. Interestingly, native spiroosomes isolated from other bacteria or unicellular eukaryotic organisms all display an extended conformation. For example, we previously showed that spiroosomes isolated from *Clostridium difficile* or streptococcal species, all grown in fermentative conditions, are in an extended conformation. It remains to establish if these filaments are intrinsically extended or share the same conformational switch with *E. coli* spiroosomes. Nevertheless, molecules that would prevent or stimulate the extension of AdhE filaments would be valuable tools to impair fermentation in pathogens or optimize the alcoholic fermentation process in biotechnology.



## Figure legends:

### **Fig. 1: CryoEM analysis of the AdhE spiroosomes in their compact and extended forms.**

- a. Spirosomes were incubated with different cofactors as indicated in the panel. The condition *apo* corresponds to the spiroosomes as they were purified from *E. coli*. For each condition five representative 2D classes are displayed.
- b. CryoEM map of the extended spiroosomes (incubated with NAD<sup>+</sup>, Fe<sup>2+</sup> and CoA) obtained by single particle analysis. An AdhE dimer is colored with each AdhE protomer in blue and light blue respectively. Adjacent ADH domains are colored in orange and pink.
- c. CryoEM map of the compact spiroosomes (incubated with NADH and Fe<sup>2+</sup>) obtained by single particle analysis. The same color code than in panel b. is used.
- d. CryoEM map of the extended spiroosomes obtained by helical reconstruction. Representative 2D classes of the helical segments are displayed and the refined helical parameters are indicated. The same color code than in panel b. is used
- e. CryoEM map of the compact spiroosomes obtained by helical reconstruction. Representative 2D classes of the helical segments are displayed and the refined helical parameters are indicated. The same color code than in panel b. is used.

### **Fig. 2: Structure of AdhE in extended and compact filaments.**

- a. Structure of the AdhE monomer in presence of NAD<sup>+</sup> and Fe<sup>2+</sup>. The acetaldehyde dehydrogenase and alcohol dehydrogenase domain (ADH) domains are identified. In each domain, the electron density corresponding to the NAD<sup>+</sup> and Fe<sup>2+</sup> is displayed in green

mesh as it is visible in the cryoEM map. In the lower part of the panel, larger views of the cofactor binding sites are provided.

- b. Structure of the AdhE dimer. The AdhE<sub>n</sub> dimer is made of the  $\alpha$  (in light blue) and  $\beta$  (in blue) protomers. Each protomer is composed of ADH and AIDH domains. The AdhE<sub>n</sub> dimer is in interaction with the ADH<sub>n-1</sub> and ADH<sub>n+1</sub>. The AdhE <sub>$\alpha$</sub>  and AdhE <sub>$\beta$</sub>  are related by C2 symmetry.
- c. Structural model of the AdhE filament in its extended conformation. This model was obtained by docking the structure of the AdhE dimer shown in b. in the cryoEM map obtained by HR and by duplicating this dimer along the filament axis using its helical symmetry.
- d. Structure of the AdhE monomer in presence of NADH and Fe<sup>2+</sup>. The acetaldehyde dehydrogenase and alcohol dehydrogenase domain (ADH) domains are identified. In the ADH domain, the electron density corresponding to the NADH and Fe<sup>2+</sup> is displayed in green mesh as it is visible in the cryoEM map. No density corresponding to the NADH is visible in the AIDH domain active site. In the lower part of the panel, larger views of the ADH cofactor binding site are provided.
- e. Structure of the AdhE dimer. The AdhE<sub>n</sub> dimer is made of the  $\alpha$  (in light blue) and  $\beta$  (in blue) protomers. Each protomer is composed of ADH and AIDH domains. The AdhE<sub>n</sub> dimer is in interaction with the ADH<sub>n-1</sub> and ADH<sub>n+1</sub>. The AdhE <sub>$\alpha$</sub>  and AdhE <sub>$\beta$</sub>  are related by C2 symmetry.
- f. Structural model of the AdhE filament in its compact conformation. This model was obtained by docking the structure of AdhE dimer shown in d. in the cryoEM map obtained by HR and by duplicating this dimer along the filament axis using its helical symmetry.

**Fig. 3: Comparison of the structure of AdhE in its extended conformation with monofunctional ADH and AIDH enzymes.**

- a. The structures of the monofunctional enzyme propionaldehyde dehydrogenase from *Rhodopseudomonas palustris* (left) and AdhE AIDH domain (right) are compared. The monomers share the same overall fold. Both enzymes assemble as dimers which are superimposable with each other.
- b. The structures of the monofunctional enzyme lactaldehyde:1,2-propanediol oxidoreductase from *Escherichia coli* and AdhE ADH domain are compared. The monomers share the same overall fold. Both enzymes assemble as dimers which are superimposable with each other.
- c. Localization and conservation of three loops specific to AdhE. These loops are not present in the monofunctional enzymes but are conserved in AdhE homologs.

**Fig. 4: A continuous channel between the ADH and AIDH active sites**

- a. A conserved channel crosses the monofunctional propionaldehyde dehydrogenase from *Rhodopseudomonas palustris* (left panels). This channel is conserved in the AIDH domain in AdhE (right panel). Top, cut-out slice through the AIDH domain of the bottom, surface representation of the AIDH domain showing the substrate entrance/exit channel (opposite of the NAD-binding channel).
- b. A conserved channel crosses the monofunctional lactaldehyde:1,2-propanediol oxidoreductase from *Escherichia coli* (left panels). This channel is conserved in the ADH domain in AdhE (right panel). Top, cut-out slice through the ADH domain of the bottom,

surface representation of the ADH domain showing the substrate entrance/exit channel (opposite of the NAD-binding channel).

- c. Surface representation of ADH<sub>α</sub> (in light blue) and AIDH<sub>β</sub> (in blue). The loops 2 and 3 from ADH<sub>α</sub> are colored in red.
- d. A channel connects directly the active sites of ADH<sub>α</sub> (in light blue) and AIDH<sub>β</sub> (in blue). The domains are represented as transparent surfaces and ribbons with the same color code than above. A surface representation of channel is colored in yellow. Surface representations of NAD<sup>+</sup> molecules bound to ADH and AIDH domains are colored in green.

**Fig. 5 Conformational changes between the AdhE compact and extended states.**

- a. Sub-domain motion in the AIDH domain. Ribbon representation of the AIDH domain from AdhE. The NAD-binding domain (residues 1-214) is colored in green. The catalytic domain (residues 215-448) is represented in blue. The NAD-binding domains are represented in the same position for the compact and extended state. The catalytic domain moves relative to the NAD-binding domain between AdhE compact and extended states. The axis of the catalytic domain is represented in red for the compact conformation (C) and yellow for the extended conformation (E). Top, side view of the AIDH domain. Bottom, view from the catalytic domain.
- b. Zoomed view of the AIDH catalytic site of compact and extended AdhE and monofunctional propionaldehyde dehydrogenase from *Rhodopseudomonas palustris*. The proteins are represented as blue ribbons. The catalytic histidine, glutamate and cysteine

are represented as sticks and volumes. They are colored in yellow. The NAD<sup>+</sup> molecules are represented as sticks.

- c. Surface representation of the AdhE filament in its extended (left) and compact (right) conformation. The ADH domains are colored in beige and the AIDH domains are colored in pink. The NAD<sup>+</sup> molecules are colored in green.

**Fig. 6: Functional analysis of AdhE *in vitro* and *in vivo*.**

- a. Negative stain electron micrograph of purified Wild-Type AdhE filaments. Scale bar 100nm
- b. Negative stain electron micrograph of purified  $\Delta$ 446-449 AdhE filaments. Scale bar 50 nm.
- c. Enzymatic assays monitoring AdhE activities of Wild-Type and  $\Delta$ 446-449 mutant AdhE. The conditions of each assay are indicated in the legend of the graph.
- d. Growth curves for K12 *E. coli* strains in fermentative conditions in minimal medium. The strains used are indicated in the legend of the graph.

## Methods

### Spirosome expression and purification

The gene encoding AdhE from *E. coli* (AdhE<sup>*E.coli*</sup>) was amplified from *E.coli* K12 genomic DNA and cloned into the pET15 expression vector resulting in a sequence coding for a N-terminal hexahistidine tagged AdhE (His<sub>6</sub>-AdhE). Plasmids from a single clone were isolated, checked by sequencing and transformed into *E. coli* BL21(DE3) bacteria. Bacteria were grown in LB media at 37°C, 180rpm to exponential phase. From OD<sub>600</sub>=0.6-0.7, overexpression was induced by adding 1mM isopropyl β-D-1 thiogalactopyranoside for 16h at 16°C. Then, cells were pelleted at 6000g for 30 min and resuspended in lysis buffer containing cComplete Protease Inhibitor Cocktail, DNase enzyme, lysozyme. Cells were sonicated and debris were pelleted at 11000g for 1h. The supernatant was loaded on a nickel-NTA affinity column (GE Healthcare) and His<sub>6</sub>-AdhE was eluted with 300mM imidazole. Fractions containing AdhE were loaded on a Superdex200 (GE Healthcare) size exclusion column. Purity of AdhE was confirmed with 12% SDS-PAGE. The presence of spiroosomes was checked by negative stain electron microscopy. 5uL of sample was applied on a glow-discharged carbon-coated grids (300 mesh Copper, EMS). After two washes with water and one wash with a drop of 0.75% uranyl formate, the sample was stained for 1 min with one drop of uranyl formate and blotted with Whatman paper. Micrographs were collected using CM120 microscope (FEI) operated at 120kV equipped with CCD camera.

### Cryo-electron microscopy

Freshly purified protein was incubated with 5mM NAD<sup>+</sup>, 5μM CoA, 0.3mM Fe(NH<sub>4</sub>)(SO<sub>4</sub>)<sub>2</sub>, 3mM MgSO<sub>4</sub> and applied to cryoEM grids. Samples were vitrified with a Vitrobot

(ThermoFisher) at 4°C at 100% humidity. 4 $\mu$ L of sample was applied onto glow-discharged (Elmo Cordouan) grids. The excess of sample was immediately blotted away (4 seconds) with Whatman paper and plunged into liquid ethane cooled by liquid nitrogen. Movies were recorded on Talos Arctica (ThermoFischer) operated at 200kV equipped with K2 direct electron detectors at 36000x of magnification and a pixel size of 1.13 Å/pixel. Micrographs were collected in a defocus range of -0.4  $\mu$ m to -2  $\mu$ m and with a dose of 0.77 electrons per Å<sup>2</sup> per frame.

### **Image processing and 3D reconstruction**

Movies were aligned for beam-induced motion using MotionCor2 and CTF parameters were assessed using GCTF. The following steps were performed using RELION 3.0 software. Details and statistics about each dataset are provided in the table 1.

For single particle analysis (SPA) approach, non-overlapping segments of the AdhE filaments were manually picked and particles were extracted using a box size of 260 pixels. These particles were 2D classified in 10 classes. 2D classes corresponding to distinct orientations of the filaments were selected and used as references to automatically pick segments in all the micrographs. After extraction, several rounds of 2D classification were performed. From a subset containing 10000 particles, an initial 3D map was reconstructed without imposing symmetry. The whole dataset was then used to refine this 3D map. A homology model of *E.coli* AdhE was generated with SWISS-MODEL<sup>19</sup> using the crystal structure of *Vibrio parahaemolyticus* acetaldehyde dehydrogenase (PDB code 3MY7) of the *V. parahaemolyticus* AdhE and the structure of *Geobacillus thermoglucosidasius* alcohol dehydrogenase domain (PDB code 3ZDR)<sup>16</sup> of *G. thermoglucosidasius* AdhE. The generated AdhE model was fitted in the cryoEM map using UCSF Chimera<sup>27</sup>. A 3D mask was generated in Chimera to contain only

one AdhE dimer and the adjacent ADH domains. This 3D mask was then used for focused refinement in RELION. After CT refinement and Bayesian polishing, the 3D map was further refinement by focused refinement. The densities outside of the 3D mask used above for focused refinement were subtracted and a final refinement was performed. For the map of the extended AdhE filament, C2 local symmetry was applied during this refinement to obtain the final map. The final resolution was calculated with two masked half-maps, using 0.143 Fourier shell correlation (FSC) cut-off criterion. Local resolution was estimated using RELION (Supplementary Fig. 3). Map visualizations were prepared using UCSF Chimera.

For helical reconstruction (HR), the procedure was similar with the following differences. During manual and automatic picking, overlapping segments of the filaments were used. No initial model was generated. Instead, a cylinder of 150 Å in diameter was used. A first refinement without any symmetry imposed was performed. The helical twist and rise were determined in real-space on this initial model. Then, these helical parameters were used and refined in further refinements.

### **Model building and refinement of atomic models**

For the model of AdhE in its extended state, an homology model of AdhE<sup>*E.coli*</sup> was fitted in the refined SPA cryoEM map with C2 local symmetry. Using these models as starting points, an initial 3D model of the AdhE dimer and adjacent ADH domains was manually built in *Coot*<sup>28</sup>. The map was sharpened in *PHENIX*<sup>30-31</sup> (*phenix.autosharpen*). The final model was refined by several rounds of manual refinement in *Coot* software<sup>28</sup> and real-space refinement using *phenix.real\_space\_refine* with NCS restrains. The model was validated using MolProbity<sup>29</sup> and *phenix.validation\_cryoem* implemented in *PHENIX* software.



For the model of AdhE in its compact state, the models of the AIDH and ADH domains obtained for the extended state were docked in the cryoEM map obtained by SPA. The cryoEM map was sharpened in *PHENIX* (phenix.autosharpen). An initial 3D model of the AdhE dimer and adjacent ADH domains was manually built in *Coot*. The final model was refined by several rounds of manual refinement in *Coot* software and real-space refinement using phenix.real\_space\_refine with NCS rand reference model restrains. The reference model used was the model obtained for AdhE in its extended state. The model was validated using MolProbity<sup>29</sup> and phenix.validation\_cryoem implemented in *PHENIX* software.

For the models of the AdhE filaments in their extended and compact states, the corresponding model of the AdhE dimer were docked into the cryoEM HR maps obtained. These maps were sharpened in *PHENIX* and symmetrized in RELION using the refined helical parameters. The model was refined using using phenix.real\_space\_refine with NCS and reference model restrains. The reference model used was the AdhE model in its extended state. The model was validated using MolProbity and phenix.validation\_cryoem implemented in *PHENIX* software.

## **Mutagenesis**

His<sub>6</sub>-AdhE-pET15 plasmid was amplified using 5' AACATGTTGTGGCACAAC and 5' AGCAACGGTTTTCTTGTTG in order to delete the coding region corresponding of 446-449 amino acids. After DpnI digestion, amplified fragment was phosphorylated using T4 polynucleotide kinase (NEB) and then ligated using T4 DNA ligase (NEB). DH5 $\alpha$  were transformed with this plasmid. Plasmids from one single clone were extracted and checked by sequencing.

## **Multi-angle laser light scattering (MALS)**

Size exclusion chromatography (SEC) experiments coupled to multi-angle laser light scattering (MALS) and refractometry (RI) were performed on a Superdex S200 5/150 GL increase column (GE Healthcare). 25  $\mu$ l of AdhE mutant protein were injected at a concentration of 10 mg.ml<sup>-1</sup> in buffer 0.05M Tris HCl pH 7.5, 0.2M NaCl. On-line MALS detection was performed with a miniDAWN-TREOS detector (Wyatt Technology Corp., Santa Barbara, CA) using a laser emitting at 690 nm and by refractive index measurement using an Optilab T-rex system (Wyatt Technology Corp., Santa Barbara, CA). Weight averaged molar masses (Mw) were calculated using the ASTRA software (Wyatt Technology Corp., Santa Barbara, CA).

## **Enzymatic assays**

Enzymatic assays were performed at 37°C by following the absorbance of NADH at 340nm with infinite M1000 plate-reader (TECAN). Reactions were started by adding of 0.04-4 $\mu$ M of purified enzyme. Reductase activities of acetaldehyde-alcohol dehydrogenase were monitored using 0.2mM acetyl-CoA and 0.4mM NADH in Tris-NaCl buffer pH 7.5. Dehydrogenase activities of acetaldehyde-alcohol dehydrogenase were monitored using 1% ethanol, 1.5mM NAD<sup>+</sup> and 0.2mM CoA in Tris-NaCl buffer pH 8.8. Three independent experiments were performed each in triplicate.

## **Anaerobic growth of complemented $\Delta adhe$ K12 strain**

The  $\Delta adhe$  K12 strain was provided by the Keio Collection<sup>22</sup>. Two versions of the low copy PKG116 plasmid were constructed using AQUAcloning method: PKG116-AdhE<sup>WT</sup> and PKG116-AdhE <sup>$\Delta$ 446-449</sup>. Each plasmid was incorporated into the  $\Delta adhe$  K12 strain using electroporation technique. Bacteria were grown in LB medium containing 1 $\mu$ M of sodium salicylate and then

back diluted at  $OD_{600}=0.1$  in minimum media. Anaerobic growth curves were monitored using optical density ( $OD_{600}$ ). Three independent experiments were performed each in triplicate using K12 WT as a positive control. The expression of AdhE was checked using Western-blot method (as previously described).

## Data availability

The cryoEM maps of *E. coli* spiroosomes have been deposited in the Electron Microscopy Data Bank under ID codes EMD-AAAA and EMD-BBBB, for the extended spiroosomes obtained by SPA and HR respectively and under ID codes EMD-CCCC and EMD-DDDD for the compact spiroosomes obtained by SPA and HR respectively. The atomic coordinates for AdhE in its extended and compact conformation have been deposited in the PDB under ID codes PDB XXXX and YYYYY respectively.

## Acknowledgements

This work was supported by university of Bordeaux, CNRS and ERC CoG TransfoPneumo. PP holds a PhD fellowship from University of Bordeaux.

The authors thank Claire Stines-Chaumeil for advice in Enzymology, Armel Bezault from the cryoEM facility at IECB.

## References

1. Leonardo, M. R., Cunningham, P. R. & Clark, D. P. Anaerobic regulation of the adhE gene, encoding the fermentative alcohol dehydrogenase of *Escherichia coli*. *J. Bacteriol.* **175**,

- 870–878 (1993).
2. Van Lis, R. *et al.* Concerted up-regulation of aldehyde/alcohol dehydrogenase (ADHE) and starch in *Chlamydomonas reinhardtii* increases survival under dark anoxia. *J. Biol. Chem.* **292**, 2395–2410 (2017).
  3. Zetterström, C. E. *et al.* Screening for Inhibitors of Acetaldehyde Dehydrogenase (AdhE) from Enterohemorrhagic *Escherichia coli* (EHEC). *SLAS Discov.* **23**, 815–822 (2018).
  4. Zheng, T. *et al.* Cofactor specificity of the bifunctional alcohol and aldehyde dehydrogenase (AdhE) in wild-type and mutant *Clostridium thermocellum* and *Thermoanaerobacterium saccharolyticum*. *J. Bacteriol.* **197**, 2610–2619 (2015).
  5. Tian, L., Cervenka, N. D., Low, A. M., Olson, D. G. & Lynd, L. R. A mutation in the AdhE alcohol dehydrogenase of *Clostridium thermocellum* increases tolerance to several primary alcohols, including isobutanol, n-butanol and ethanol. *Sci. Rep.* **9**, 1736 (2019).
  6. Membrillo-Hernández, J. *et al.* Evolution of the adhE Gene Product of *Escherichia coli* from a Functional Reductase to a Dehydrogenase. *J. Biol. Chem.* **275**, 33869–33875 (2000).
  7. Kim, H. & Bhunia, A. K. Secreted Listeria adhesion protein (Lap) influences Lap-mediated *Listeria monocytogenes* paracellular translocation through epithelial barrier. *Gut Pathog.* **5**, 1 (2013).
  8. Jagadeesan, B. *et al.* LAP, an alcohol acetaldehyde dehydrogenase enzyme in Listeria, promotes bacterial adhesion to enterocyte-like Caco-2 cells only in pathogenic species. *Microbiology* **156**, 2782–2795 (2010).
  9. Luong, T. T. *et al.* Ethanol-induced alcohol dehydrogenase E (AdhE) potentiates pneumolysin in *Streptococcus pneumoniae*. *Infect. Immun.* **83**, 108–119 (2015).
  10. Beckman, K. S. *et al.* The metabolic enzyme AdhE controls the virulence of *Escherichia*

- coli* O157:H7 . *Mol. Microbiol.* **93**, 199–211 (2014).
11. Echave, P., Tamarit, J., Cabisco, E. & Ros, J. Novel antioxidant role of alcohol dehydrogenase E from *Escherichia coli*. *J. Biol. Chem.* **278**, 30193–30198 (2003).
  12. Kawata, T., Masuda, K. & Yoshino, K. Presence of Fine Spirals (Spirosomes) in *Lactobacillus fermenti* and *Lactobacillus casei*. *Jpn. J. Microbiol.* **19**, 225–227 (1975).
  13. Laurenceau, R. *et al.* Conserved *Streptococcus pneumoniae* Spirosomes Suggest a Single Type of Transformation Pilus in Competence. *PLoS Pathog.* **11**, 1–19 (2015).
  14. Bruchhaus, I. & Tannich, E. Purification and molecular characterization of the NAD(+)-dependent acetaldehyde/alcohol dehydrogenase from *Entamoeba histolytica*. *Biochem. J.* **303**, 743–748 (1994).
  15. Kim, G. *et al.* Aldehyde-alcohol dehydrogenase forms a high-order spiroosome architecture critical for its activity. *Nat. Commun.* **10**, 4527 (2019).
  16. Extance, J. *et al.* Structure of a bifunctional alcohol dehydrogenase involved in bioethanol generation in *Geobacillus thermoglucosidasius*. *Acta Crystallogr. Sect. D Biol. Crystallogr.* **69**, 2104–2115 (2013).
  17. Scheres, S. H. W. RELION: implementation of a Bayesian approach to cryo-EM structure determination . *J. Struct. Biol.* **180**, 519–530 (2012).
  18. Kessler, D., Herth, W. & Knappe, J. Ultrastructure and pyruvate formate-lyase radical quenching property of the multienzymic AdhE protein of *Escherichia coli*. *J. Biol. Chem.* **267**, 18073–18079 (1992).
  19. Waterhouse, A. *et al.* SWISS-MODEL: homology modelling of protein structures and complexes. *Nucleic Acids Res.* **46**, W296–W303 (2018).
  20. Yang, J., Roy, A. & Zhang, Y. BioLiP: a semi-manually curated database for biologically relevant ligand–protein interactions. *Nucleic Acids Res.* **41**, 1096–1103 (2013).

21. Yang, J., Roy, A. & Zhang, Y. Protein–ligand binding site recognition using complementary binding-specific substructure comparison and sequence profile alignment. *Bioinformatics*. **29**, 2588–2595 (2013).
22. Baba, T. *et al.* Construction of *Escherichia coli* K-12 in-frame, single-gene knockout mutants: The Keio collection. *Mol. Syst. Biol.* **2**, (2006).
23. Kerfeld, C. A., Aussignargues, C., Zarzycki, J., Cai, F. & Sutter, M. Bacterial microcompartments. *Nat. Rev. Microbiol.* **16**, 277–290 (2018).
24. Cheng, S., Liu, Y., Crowley, C. S., Yeates, T. O. & Bobik, T. A. Bacterial microcompartments: their properties and paradoxes. *Bioessays*. **30**, 1084–1095 (2012).
25. Amaranthus, L. & Mújica-Jiménez, C. Complexes of NADH with betaine aldehyde dehydrogenase from leaves of the plant *Amaranthus hypochondriacus*. *Chemico-Biological Interactions*. **130-132**, 71–80 (2001).
26. Park, C. K. & Horton, N. C. Structures, functions, and mechanisms of filament forming enzymes: a renaissance of enzyme filamentation. *Biophysical Reviews*. **11**, 927–994 (2019).
27. Pettersen, E. F. *et al.* UCSF Chimera-A visualization system for exploratory research and analysis. *J. Comput. Chem.* **25**, 1605–1612 (2004).
28. Emsley, P., Lohkamp, B., Scott, W. G. & Cowtan, K. Features and development of *Coot*. *Acta Crystallogr. Sect. D Biol. Crystallogr.* **66**, 486–501 (2010).
29. Williams, C. J. *et al.* MolProbity: More and better reference data for improved all-atom structure validation. *Protein Sci.* **27**, 293–315 (2018).
30. Liebschner, D. *et al.* Macromolecular structure determination using X-rays, neutrons and electrons: recent developments in Phenix. *Acta Crystallogr.* **D75**, 861–877 (2019).

31. Afonine, P. V. *et al.* New tools for the analysis and validation of cryo-EM maps and atomic models. *Acta Crystallogr. Sect. D Biol. Crystallogr.* **74**, 814–840 (2018).

**a**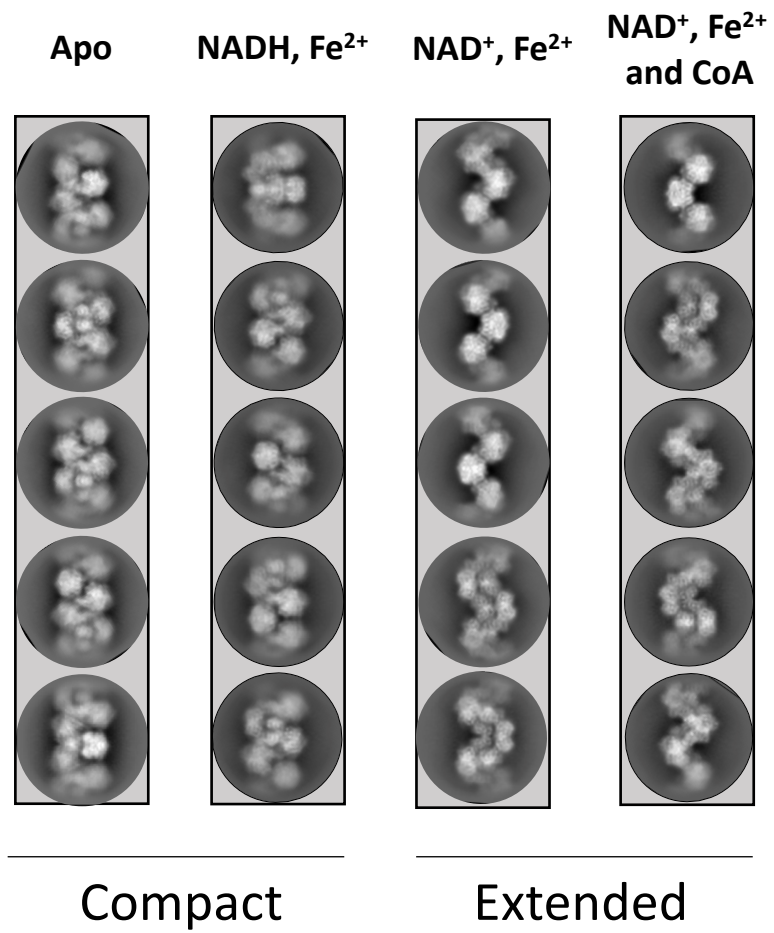**b**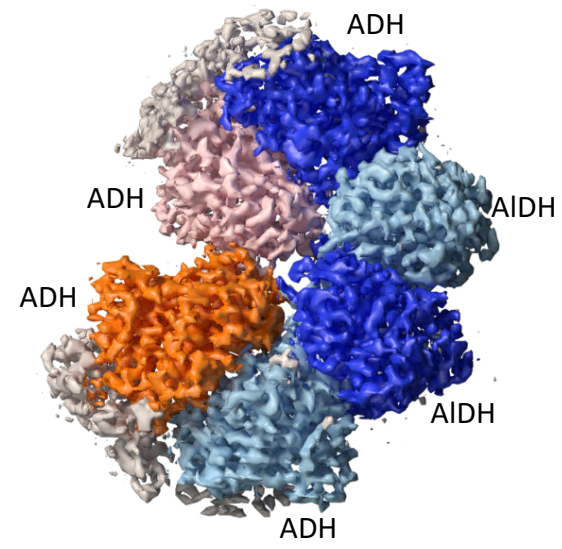**c**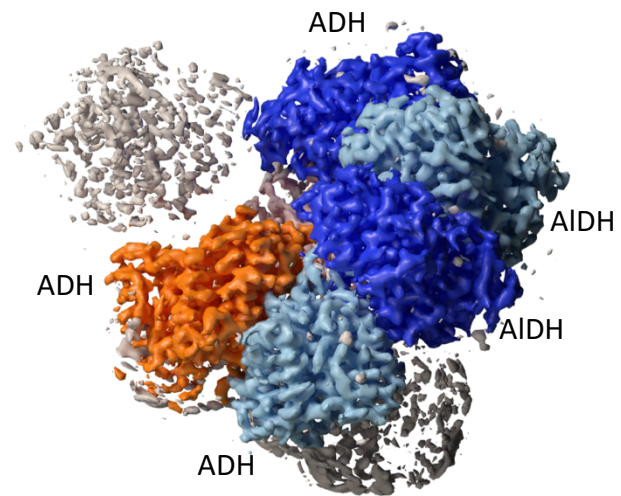**d**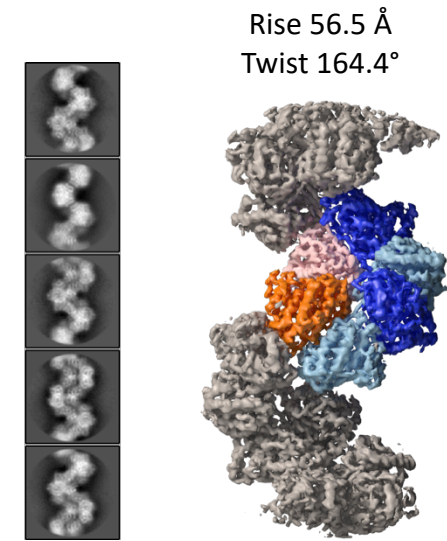**e**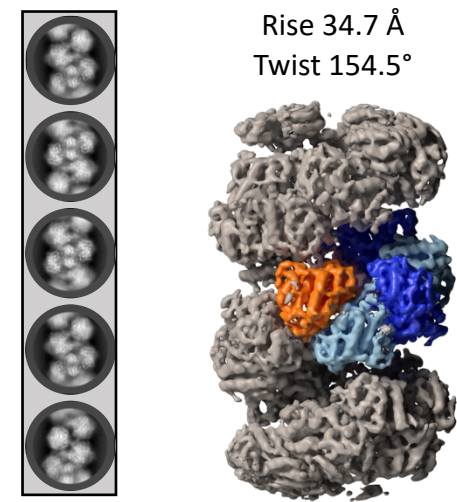**Fig. 1**



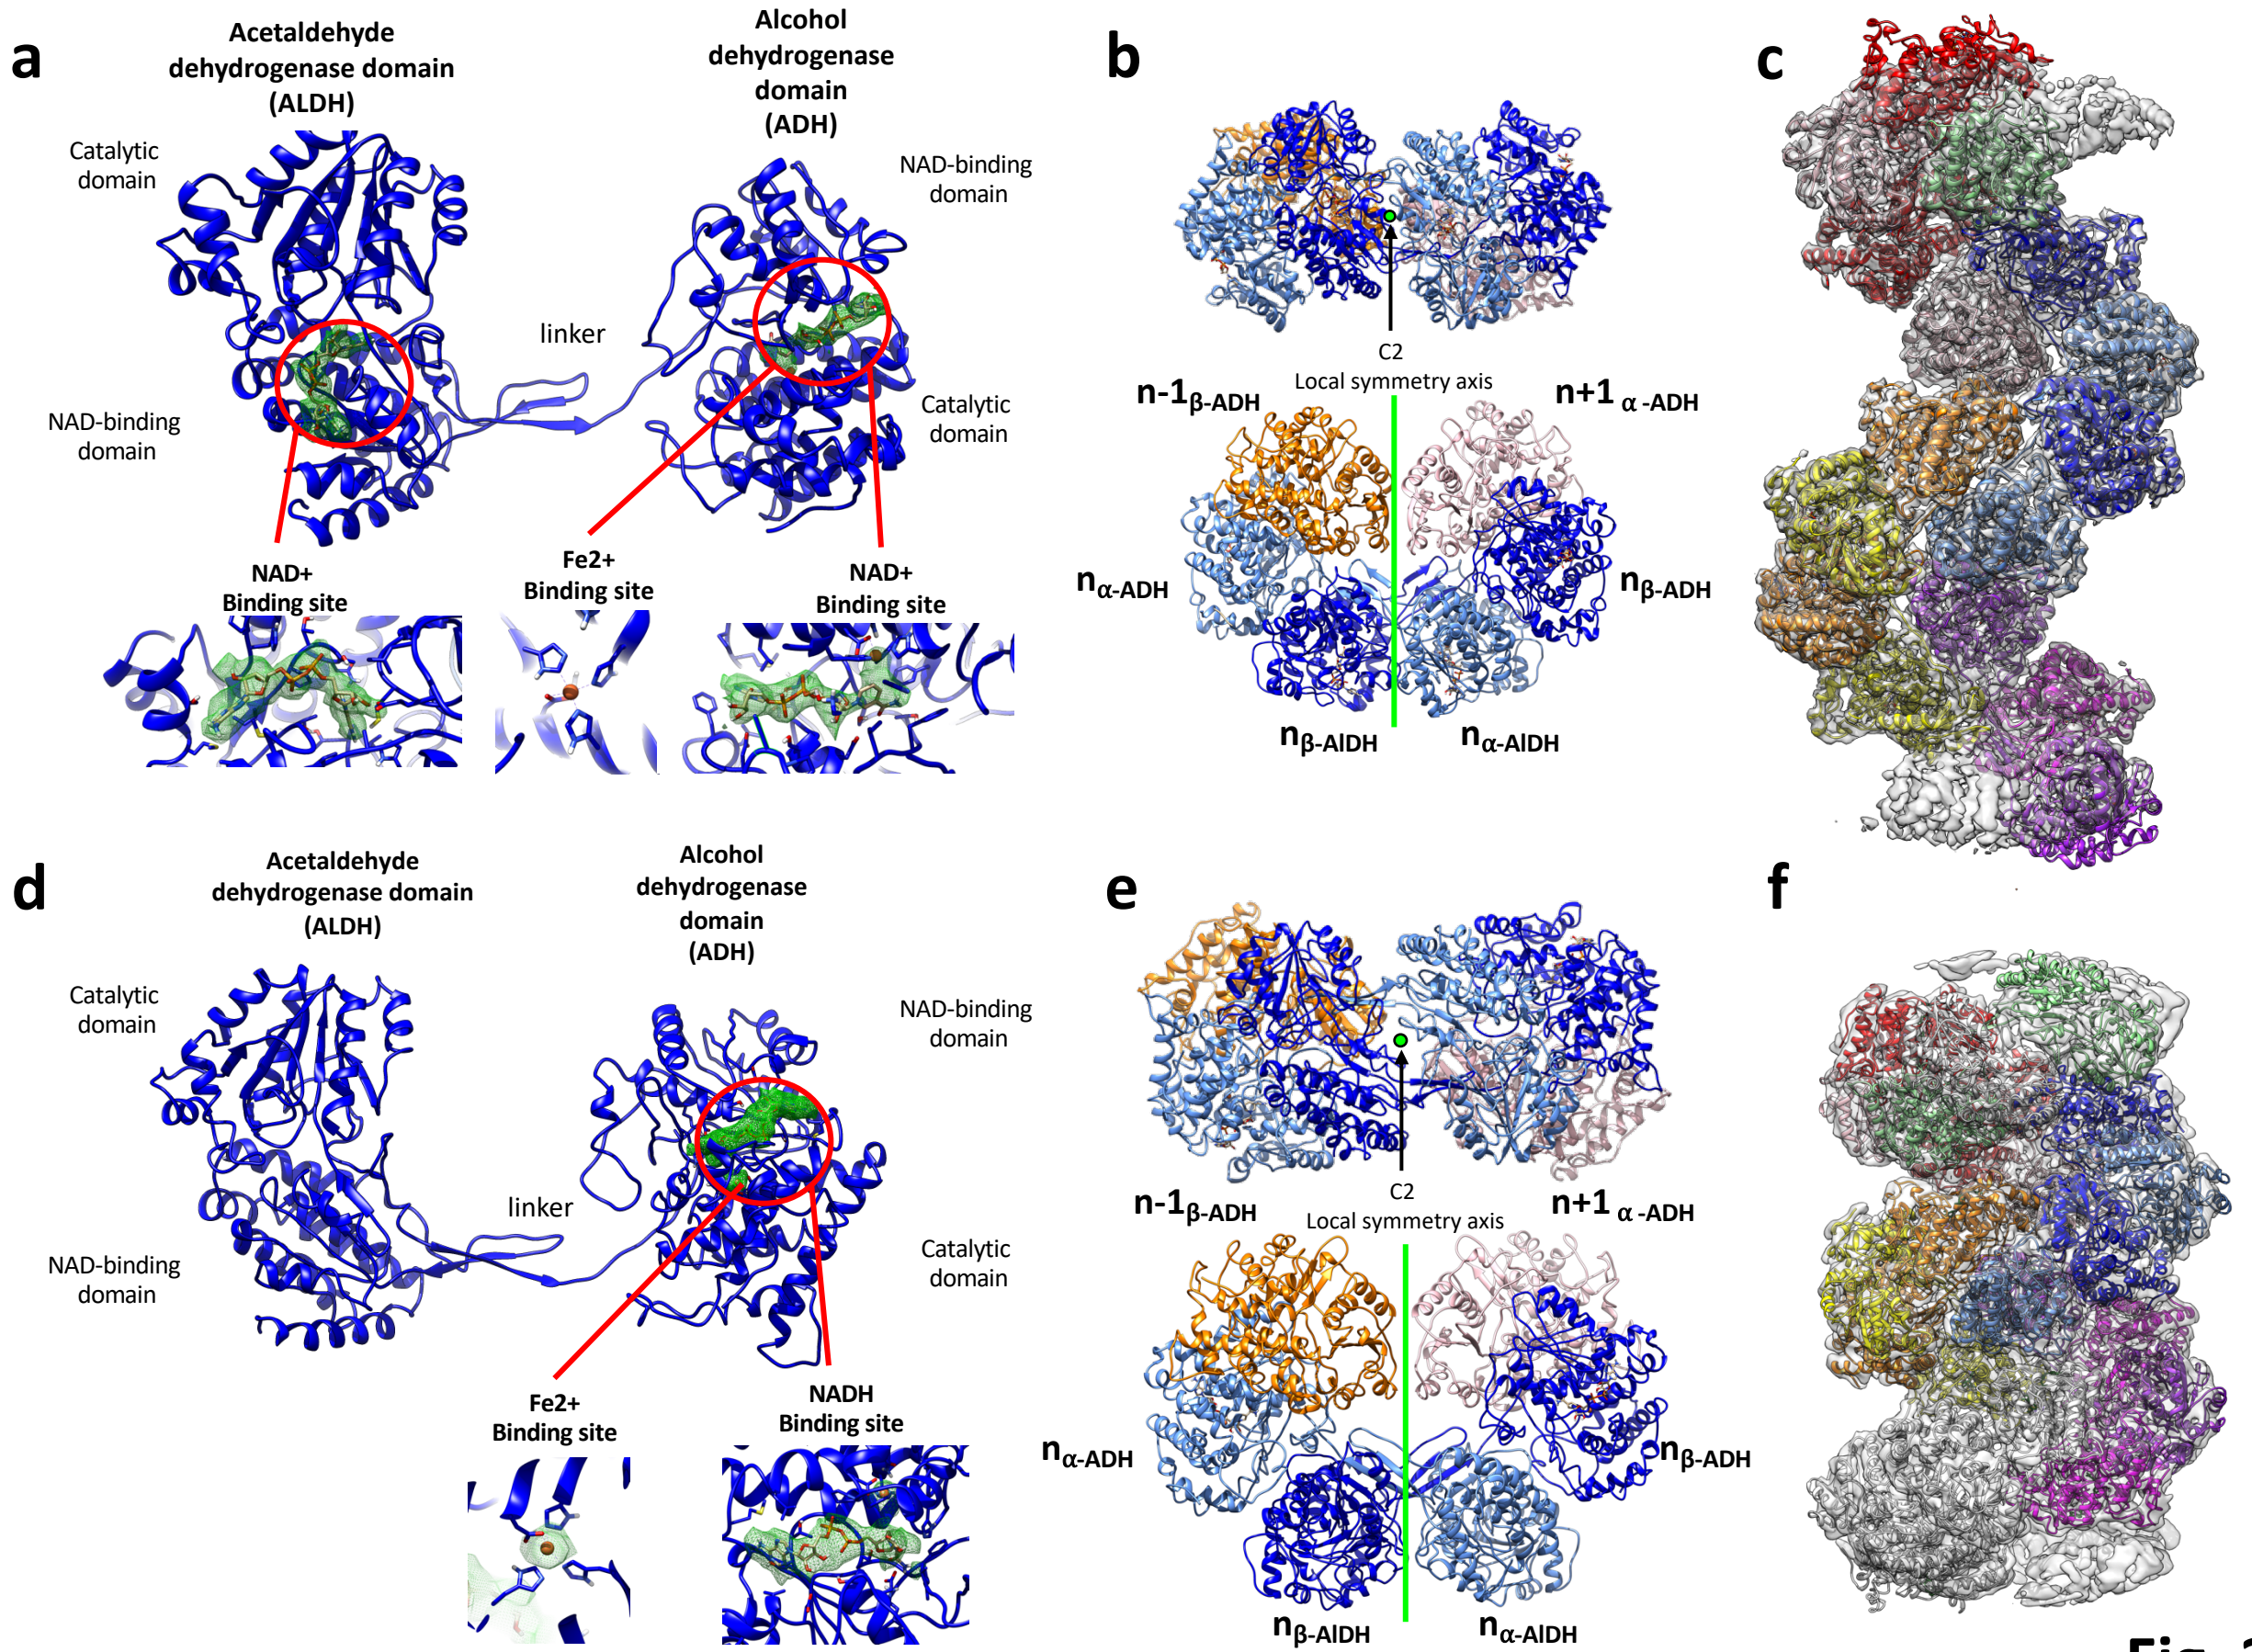

**Fig. 2**

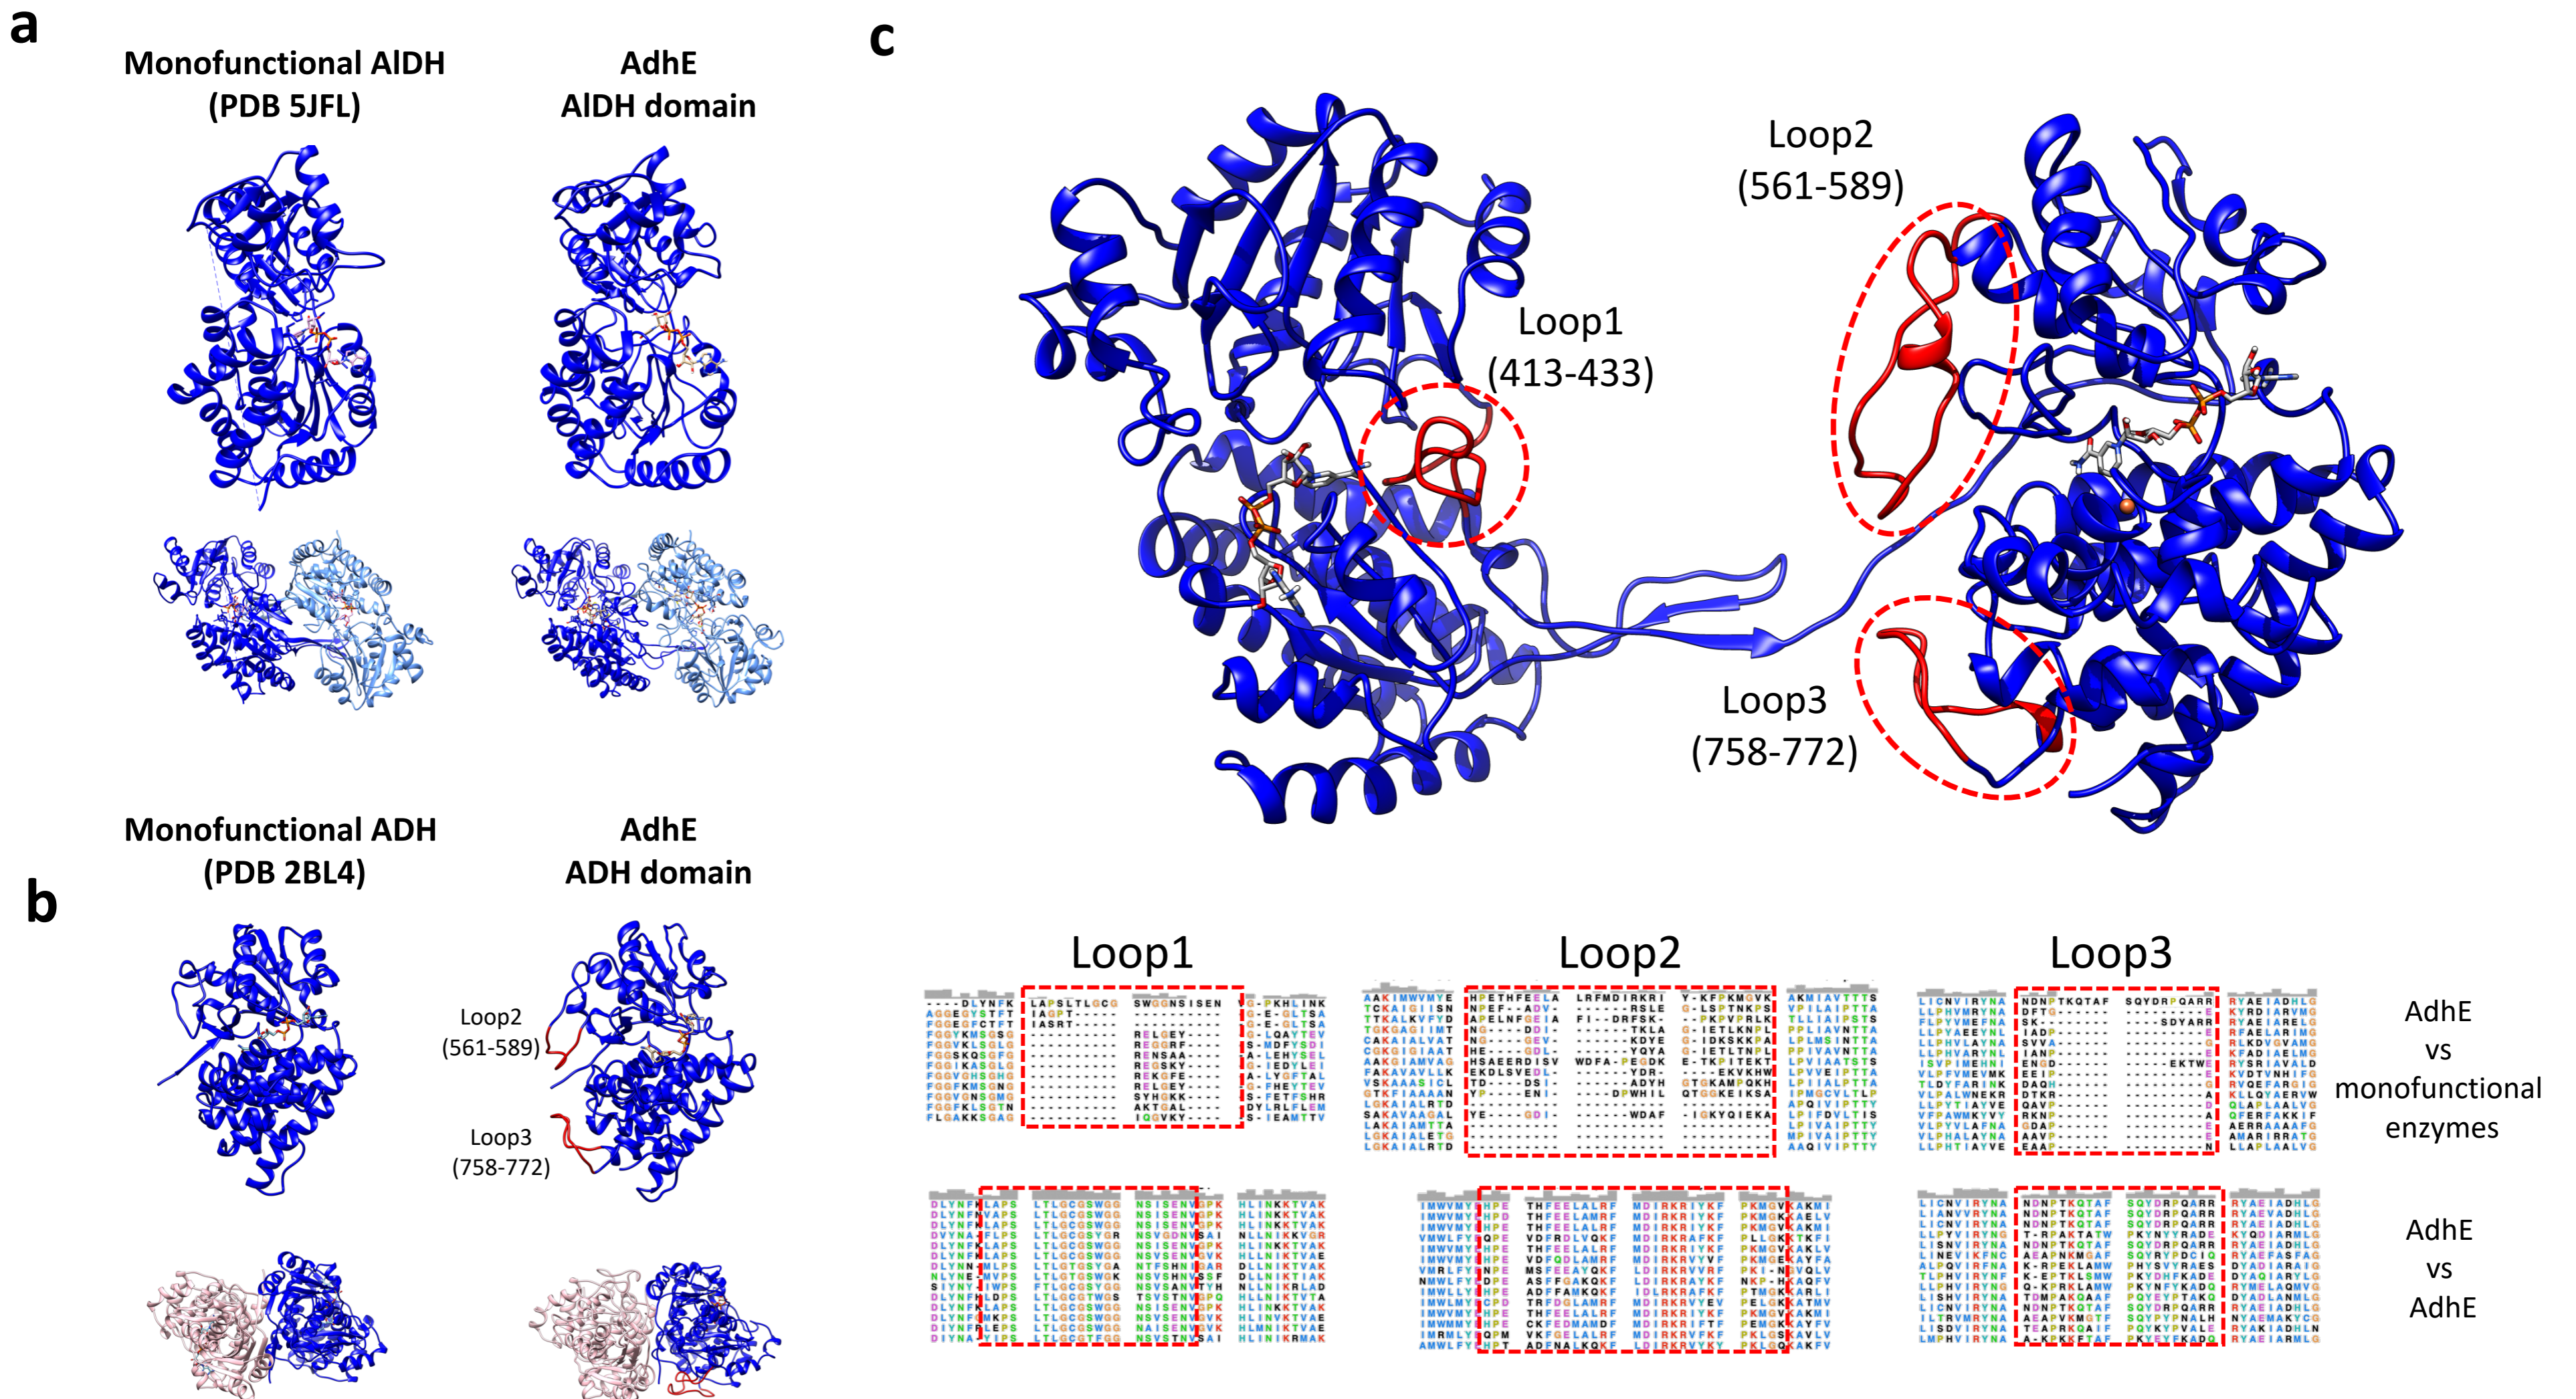

Fig. 3

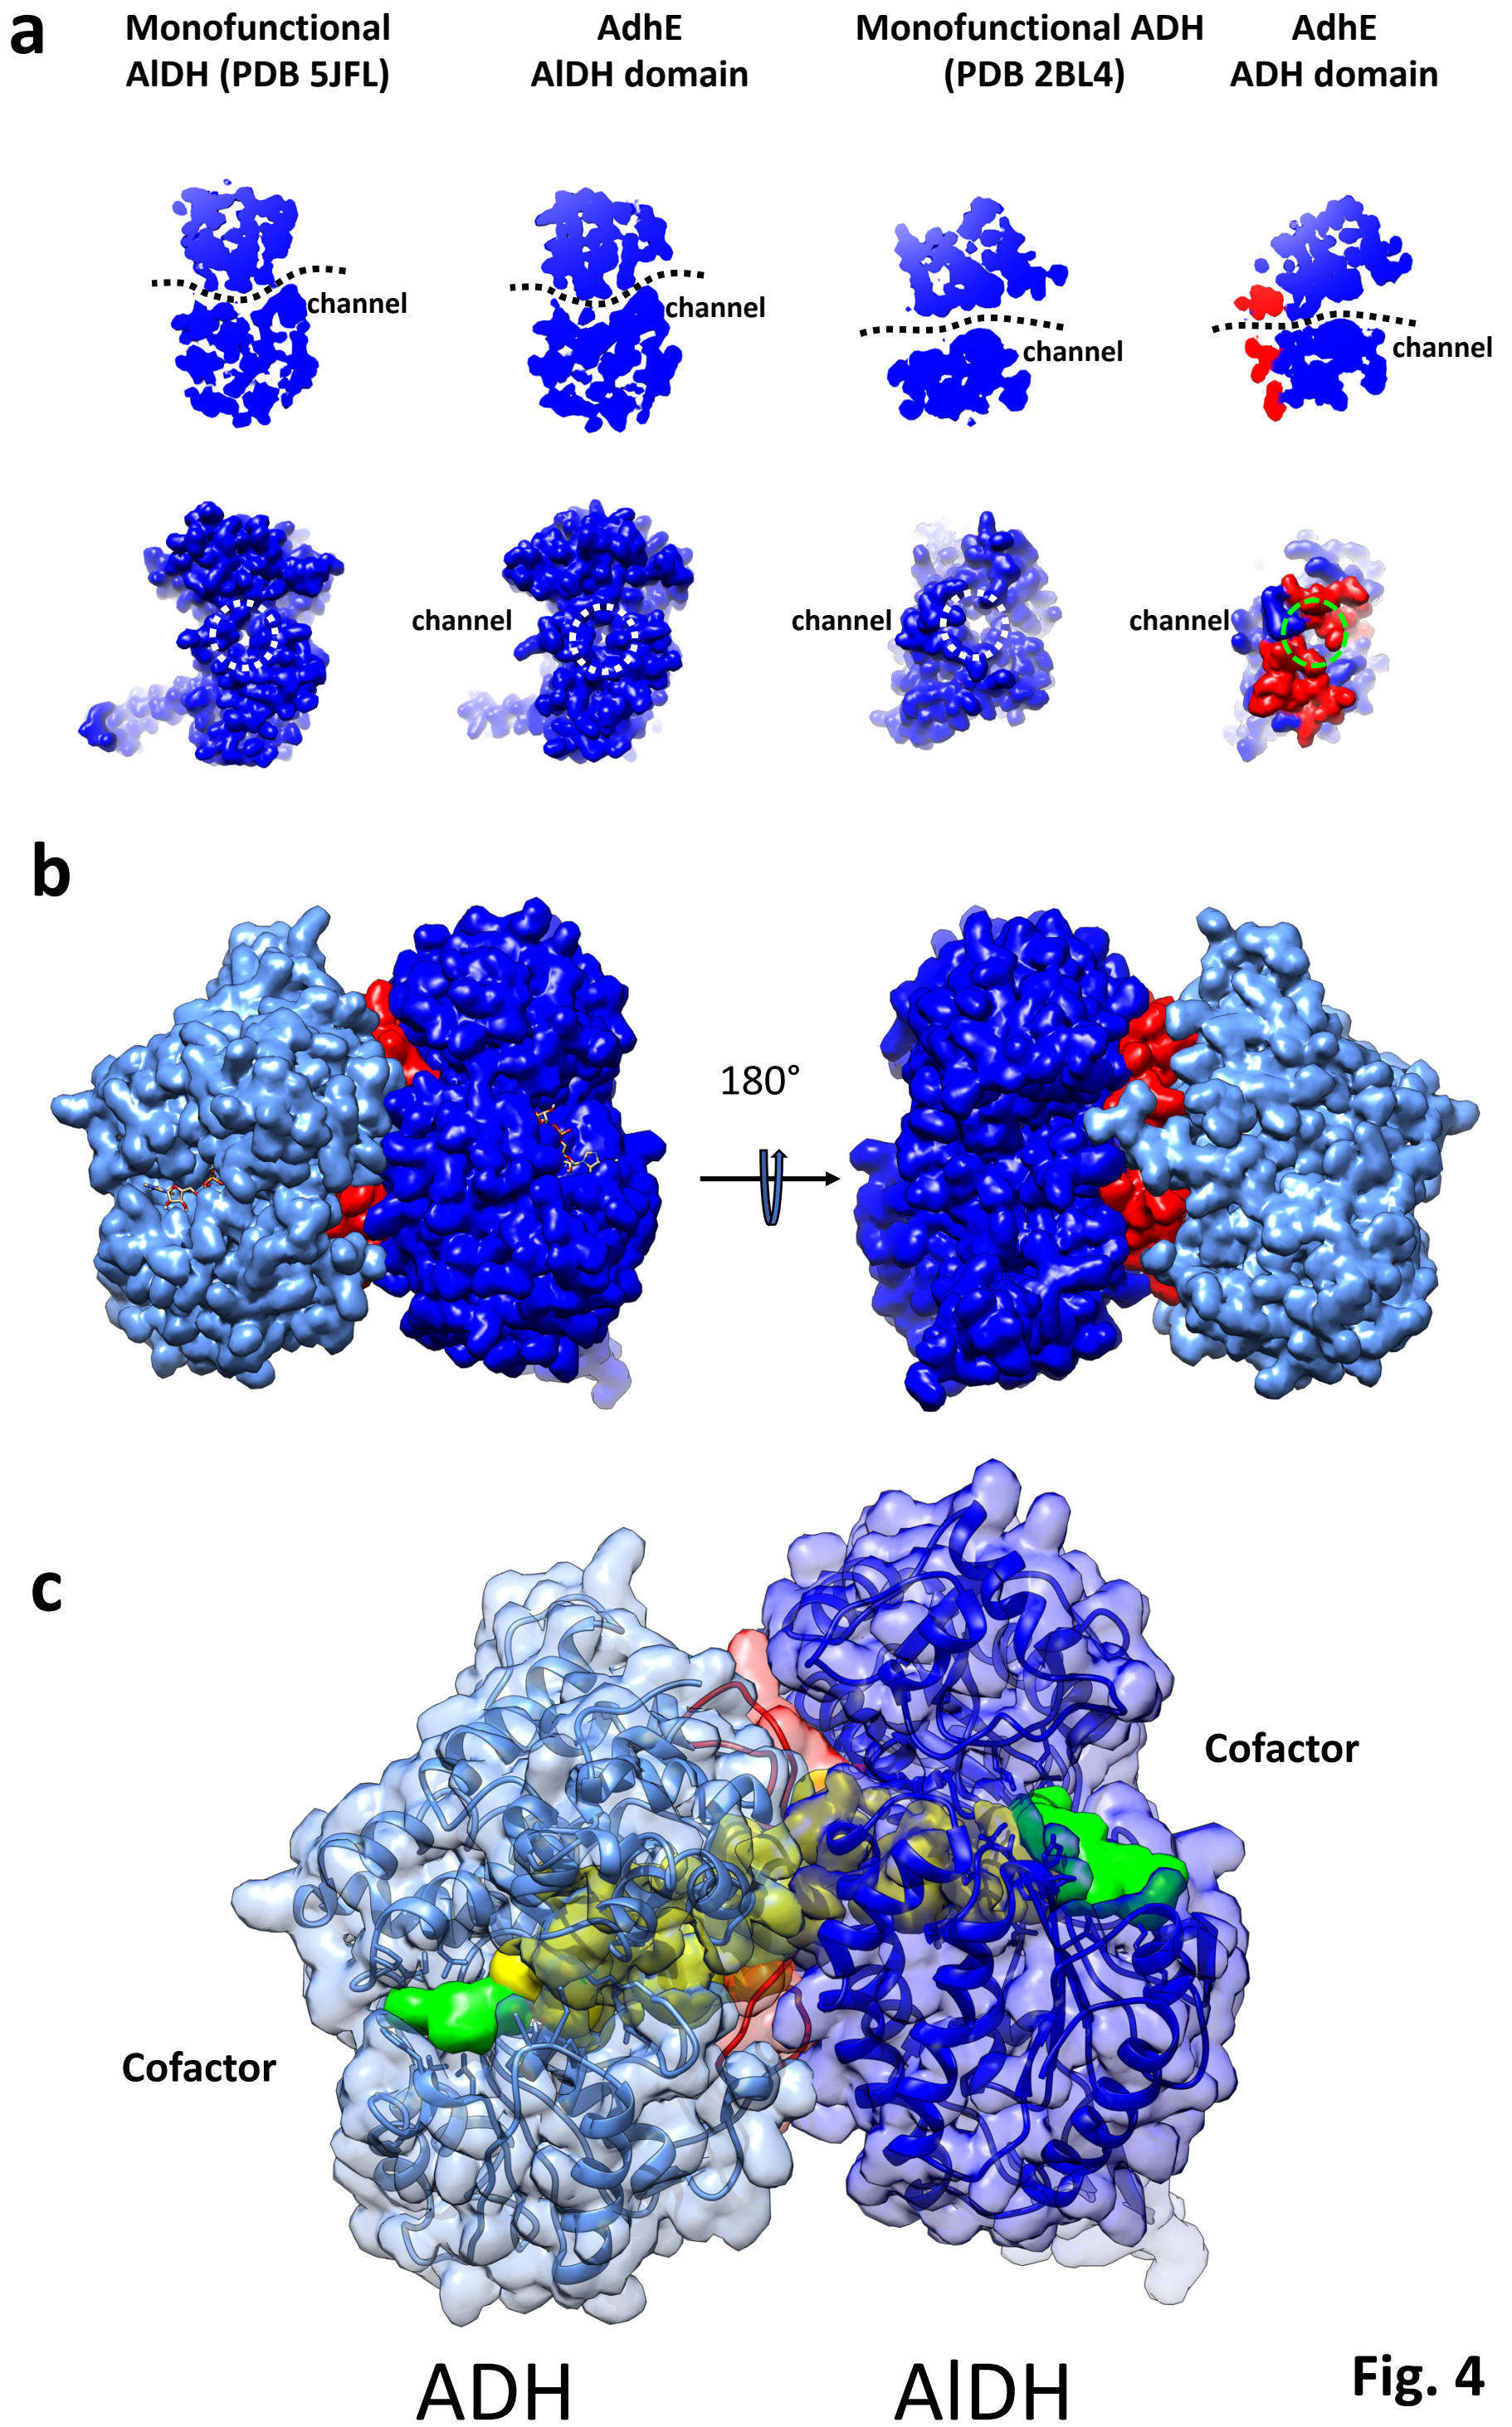

**Fig. 4**

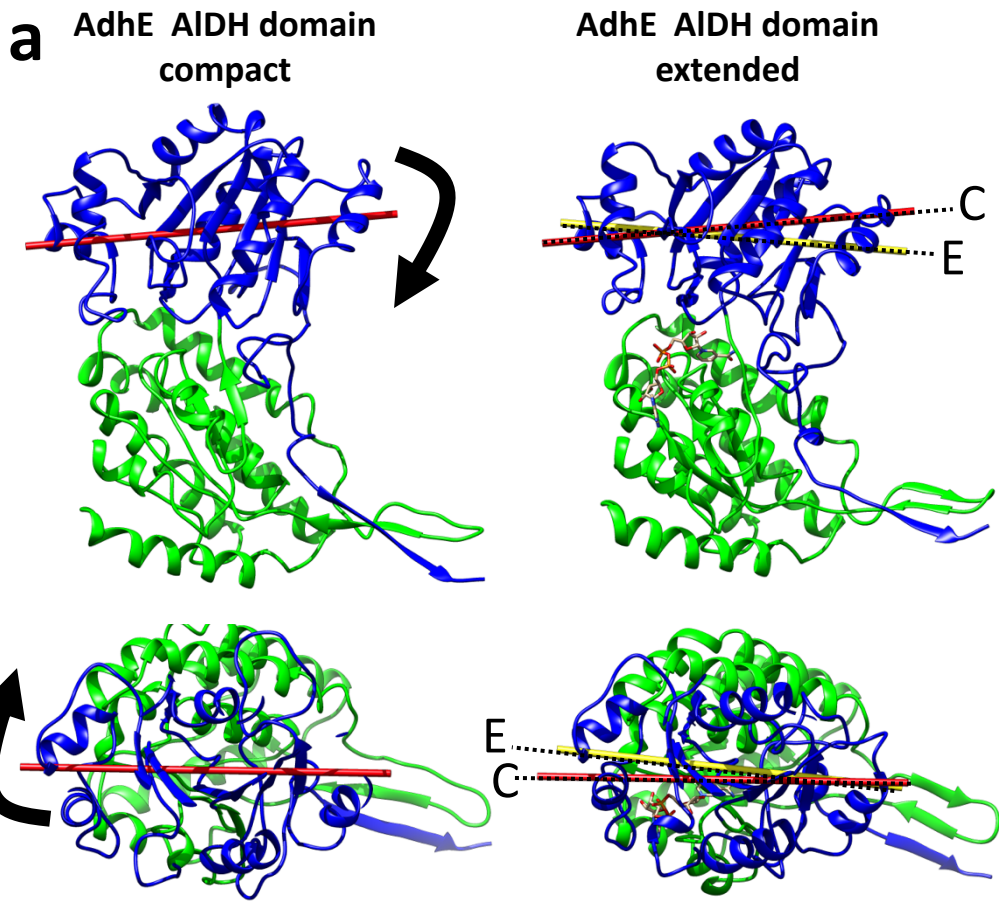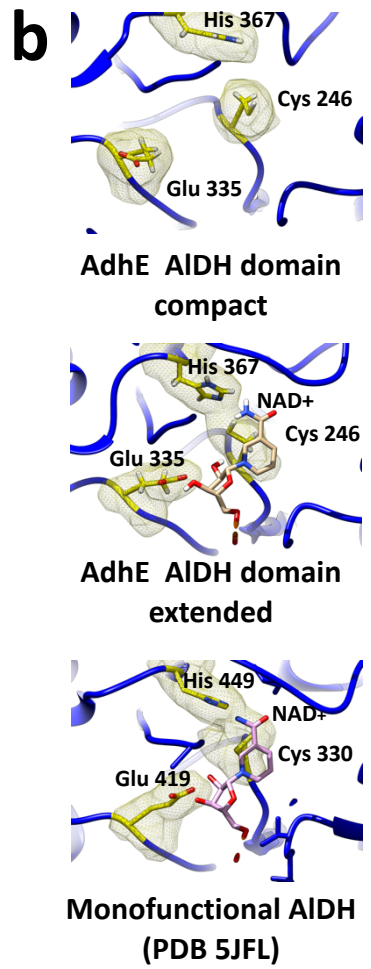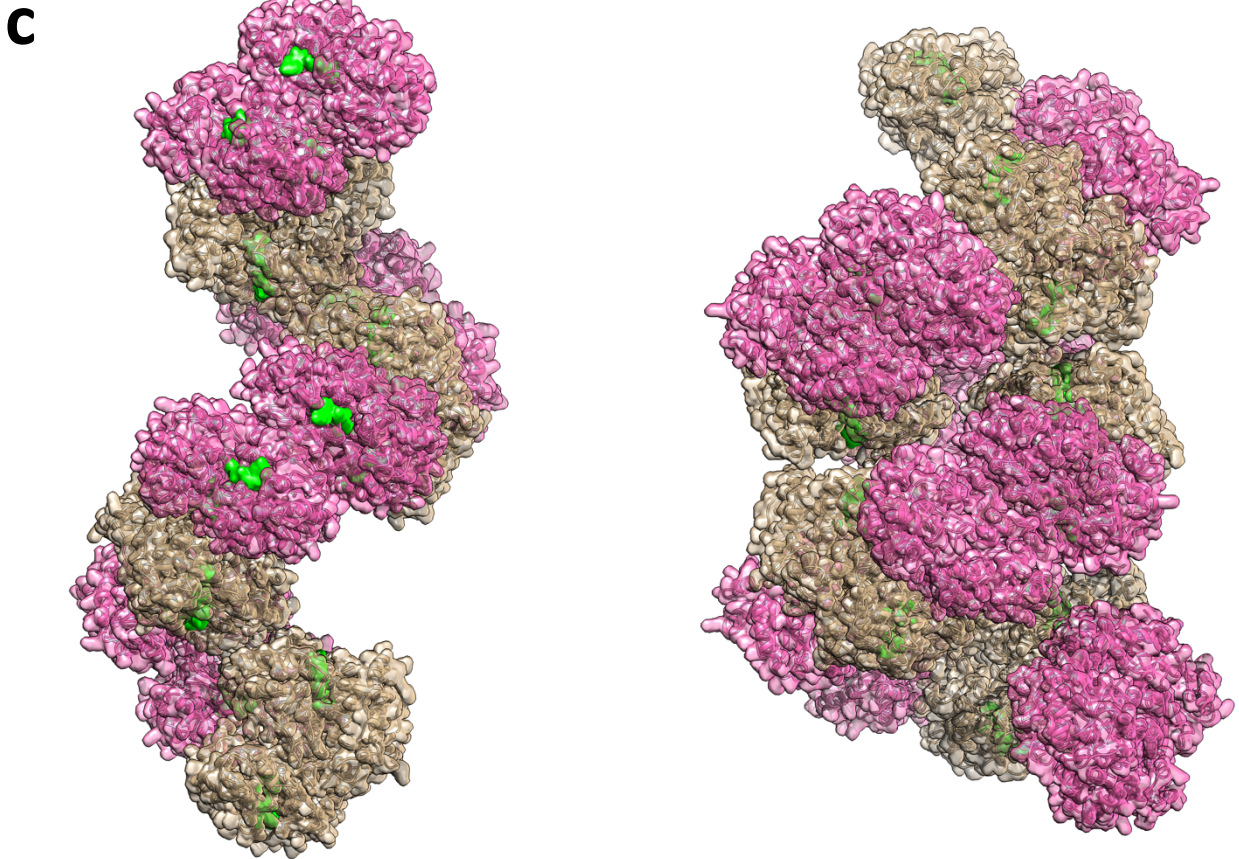

**Fig. 5**

**a**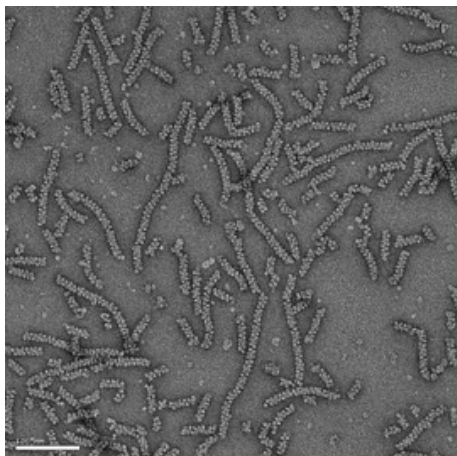**b**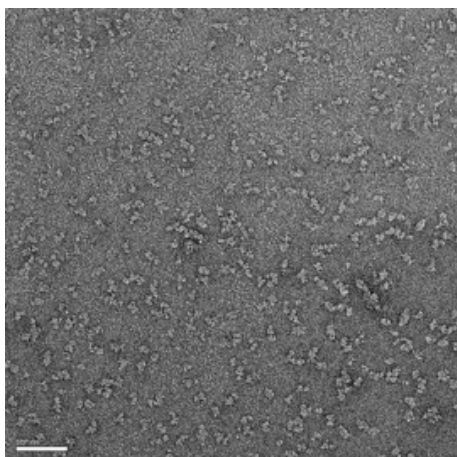**c**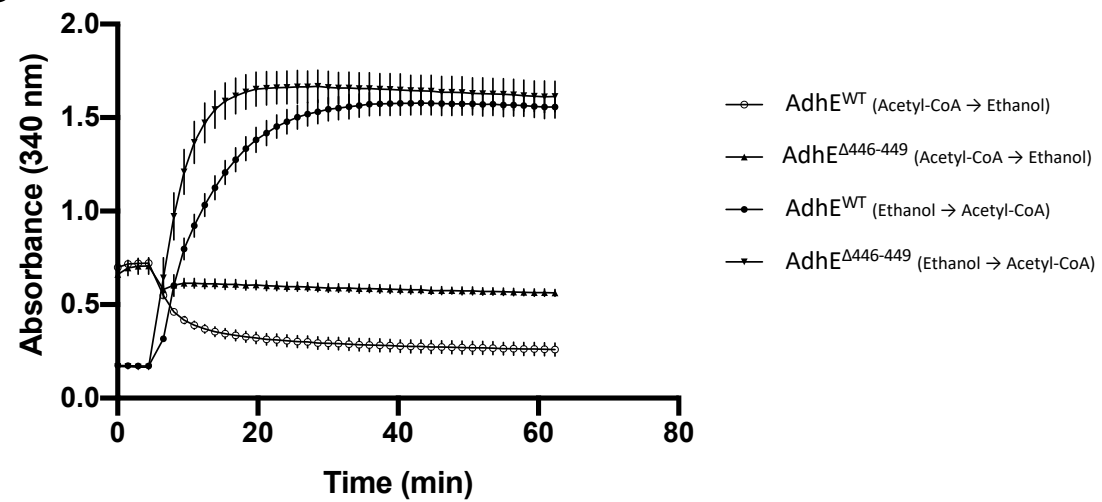**d**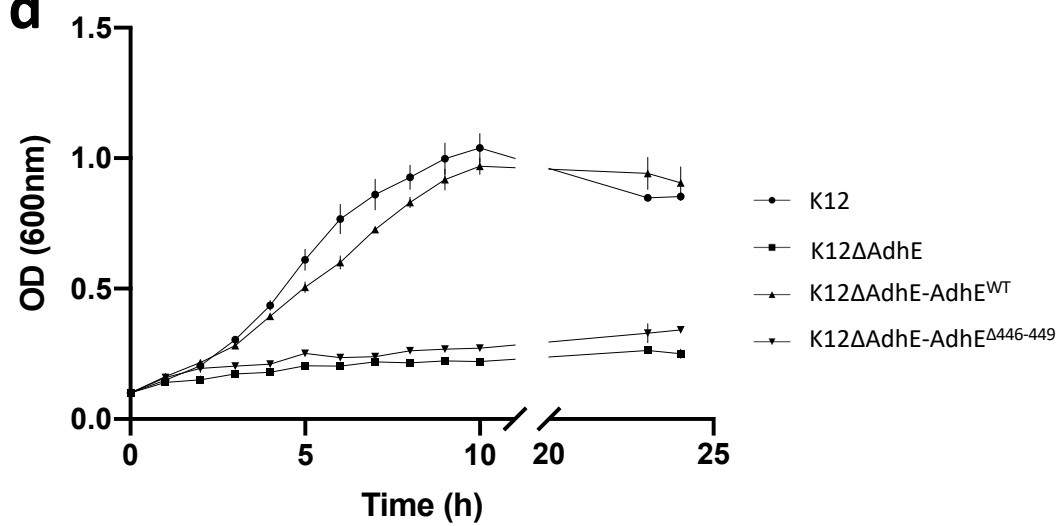**Fig. 6**

|                                              | Extended (Fe <sup>2+</sup> - NAD <sup>+</sup> - CoA) |                          | Compact (Fe <sup>2+</sup> - NADH) |                          |
|----------------------------------------------|------------------------------------------------------|--------------------------|-----------------------------------|--------------------------|
| <b>Data collection</b>                       |                                                      |                          |                                   |                          |
| Microscope - Camera                          | Talos Arctica - K2 summit                            |                          | Talos Arctica - K2 summit         |                          |
| Voltage (kV)                                 | 200                                                  |                          | 200                               |                          |
| Magnification                                | 36000                                                |                          | 36000                             |                          |
| Electron exposure (e-/Å <sup>2</sup> )       | 0.77                                                 |                          | 0.77                              |                          |
| Pixel size (Å)                               | 1.13                                                 |                          | 1.13                              |                          |
| Decofocus range (um)                         | 0.4 – 2.4                                            |                          | 0.4 – 2.4                         |                          |
| Processing                                   | Helical reconstruction                               | Single particle analysis | Helical reconstruction            | Single particle analysis |
| Symmetry imposed                             | C1                                                   | C1<br>C2                 | C1                                | C1                       |
|                                              | Rise 56.5 Å,<br>Twist 164.4°                         |                          | Rise 34.7 Å,<br>Twist 154.5°      |                          |
| Initial particle images (no.)                | 821 557                                              | 1 236 367                | 227 537                           | 599 988                  |
| Final particle images (no.)                  | 203 288                                              | 138 927                  | 98 677                            | 226 646                  |
| Map resolution (Å) – (FSC threshold model)   | 3.8 – (0.143)                                        | 3.4 - (0.143)            | 5 - (0.143)                       | 3.9 - (0.143)            |
| <b>Refinement &amp; Validation</b>           |                                                      |                          |                                   |                          |
| Map sharpening (B-factor) (Å <sup>-2</sup> ) | 121.41                                               | 82.58                    | 246.65                            | 206.89                   |
| <b>Model composition</b>                     |                                                      |                          |                                   |                          |
| # chains                                     | 6                                                    |                          | 6                                 |                          |
| Atoms (no.)                                  | 39 781                                               |                          | 39760                             |                          |
| Residues (no.)                               | 2 576                                                |                          | 2578                              |                          |
| Ligands (no.)                                | Fe <sup>2+</sup> (2) - NAD <sup>+</sup> (4)          |                          | Fe <sup>2+</sup> (2) – NADH (2)   |                          |
| <b>Bond lengths (Å)</b>                      |                                                      |                          |                                   |                          |
|                                              | 0.011                                                |                          | 0.006                             |                          |
| <b>Bond angles (°)</b>                       |                                                      |                          |                                   |                          |
|                                              | 0.989                                                |                          | 1.587                             |                          |
| <b>Ramachandran favored %</b>                |                                                      |                          |                                   |                          |
|                                              | 87.46                                                |                          | 85.02                             |                          |
| <b>Ramachandran allowed %</b>                |                                                      |                          |                                   |                          |
|                                              | 12.54                                                |                          | 14.05                             |                          |
| <b>Ramachandran outliers %</b>               |                                                      |                          |                                   |                          |
|                                              | 0.00                                                 |                          | 0.93                              |                          |
| <b>Rotamers outliers %</b>                   |                                                      |                          |                                   |                          |
|                                              | 1.45                                                 |                          | 3.67                              |                          |
| <b>MolProbity score</b>                      |                                                      |                          |                                   |                          |
|                                              | 2.11                                                 |                          | 2.59                              |                          |
| <b>Clashscore</b>                            |                                                      |                          |                                   |                          |
|                                              | 6.89                                                 |                          | 9.43                              |                          |
| <b>CC (mask)</b>                             |                                                      |                          |                                   |                          |
|                                              | 0.82                                                 |                          | 0.78                              |                          |
| <b>CC (box)</b>                              |                                                      |                          |                                   |                          |
|                                              | 0.83                                                 |                          | 0.77                              |                          |
| <b>CC (peaks)</b>                            |                                                      |                          |                                   |                          |
|                                              | 0.73                                                 |                          | 0.60                              |                          |
| <b>CC (volume)</b>                           |                                                      |                          |                                   |                          |
|                                              | 0.82                                                 |                          | 0.79                              |                          |
| <b>Mean CC for ligands</b>                   |                                                      |                          |                                   |                          |
|                                              | 0.76                                                 |                          | 0.71                              |                          |

**Table 1. Summary of cryo-EM data collection, model refinement and validation.**
